# Supplementary material for: A single-ion magnet building block strategy toward Dy2single-molecule magnets with enhanced magnetic performance
Source: Royal Society of Chemistry journal article supplement (doi:10.1039/d2dt03046b), 2022-01-01
Supplement: d2dt03046b1.pdf [file d2dt03046b1.pdf]

## A Single-Ion Magnet Building Block Strategy Toward Dy<sub>2</sub> Single-Molecule Magnets with Enhanced Magnetic Performance

Dong Shao,<sup>†a,d</sup> Prem Prakash Sahu,<sup>†c</sup> Wan-Jie Tang,<sup>a</sup> Yang-Lu Zhang,<sup>a</sup> Yue Zhou,<sup>a</sup> Fang-Xue Xu,  
<sup>d</sup> Xiao-Qin Wei,<sup>\*b</sup> Zhengfang Tian,<sup>a</sup> Saurabh Kumar Singh<sup>\*c</sup> and Xin-Yi Wang<sup>\*d</sup>

<sup>a</sup> Hubei Key Laboratory of Processing and Application of Catalytic Materials, College of Chemistry and Chemical Engineering, Huanggang Normal University, Huanggang 438000, P. R. China

<sup>b</sup> Department of Material Science and Engineering, Shanxi Province Collaborative Innovation Center for Light Materials Modification and Application, Jinzhong University, Jinzhong, 030619, P. R. China.

<sup>c</sup> Department of Chemistry, Indian Institute of Technology Hyderabad, Kandi-502285, Sangareddy, Telangana, India

<sup>d</sup> *State Key Laboratory of Coordination Chemistry, Collaborative Innovation Center of Advanced Microstructures, School of Chemistry and Chemical Engineering, Nanjing University, Nanjing, 210023, P. R. China.*

Correspondence and requests for materials should be addressed to

Email: [wangxy66@nju.edu.cn](mailto:wangxy66@nju.edu.cn) (X. Y. W.) or [sksingh@chy.iith.ac.in](mailto:sksingh@chy.iith.ac.in) (S. K. S.)

## Table of Contents

|                                                                                                                                                                                                                                                                                                                                                               |    |
|---------------------------------------------------------------------------------------------------------------------------------------------------------------------------------------------------------------------------------------------------------------------------------------------------------------------------------------------------------------|----|
| <b>EXPERIMENTAL SECTION</b> .....                                                                                                                                                                                                                                                                                                                             | 5  |
| <b>COMPUTATIONAL DETAILS</b> .....                                                                                                                                                                                                                                                                                                                            | 6  |
| <b>Figure S1.</b> The asymmetric units of <b>2</b> (a) and <b>3</b> (c), and the complete molecule structures of <b>2</b> (b) and <b>3</b> (d) in ellipses & sticks mode. ....                                                                                                                                                                                | 8  |
| Table S1. Selected bond lengths (Å) and bond angles (°) for <b>2</b> . ....                                                                                                                                                                                                                                                                                   | 9  |
| Table S2. Selected bond lengths (Å) and bond angles (°) for <b>3</b> . ....                                                                                                                                                                                                                                                                                   | 10 |
| Table S3. Continuous Shape Measure (CSM) analysis for eight-coordinated Dy <sup>3+</sup> ions in <b>2</b> and <b>3</b> . ..                                                                                                                                                                                                                                   | 11 |
| <b>Figure S2.</b> A portion of one-dimensional coordination chain structure of <b>2</b> along two main crystallographic axes: the a axis (a) and the b axis (b). ....                                                                                                                                                                                         | 12 |
| <b>Figure S3.</b> A portion of one-dimensional coordination chain structure of <b>3</b> along two main crystallographic axes: the b axis (a) and the c axis (b). ....                                                                                                                                                                                         | 13 |
| <b>Figure S4.</b> Comparison of the experimental PXRD patterns of <b>2</b> and <b>3</b> with the simulated patterns from single crystal structure. The calculated patterns were generated from Mercury using the CIF of the crystal structure. ....                                                                                                           | 14 |
| <b>Figure S5.</b> TGA curves of <b>2</b> and <b>3</b> measured under the Argon atmosphere upon the continuous heating with the 10 °C·min <sup>-1</sup> rate. ....                                                                                                                                                                                             | 15 |
| <b>Figure S6.</b> IR spectra of complexes <b>1</b> , <b>2</b> and <b>3</b> . ....                                                                                                                                                                                                                                                                             | 15 |
| <b>Figure S7.</b> Variable-field magnetization at 2 K for <b>2</b> (up) and <b>3</b> (down). ....                                                                                                                                                                                                                                                             | 16 |
| <b>Figure S8.</b> Temperature dependence of the in-phase ( $\chi'$ ) and out-of-phase ( $\chi''$ ) part of the ac susceptibilities measured under zero dc field for <b>2</b> . ....                                                                                                                                                                           | 17 |
| <b>Figure S9.</b> Temperature dependence of the in-phase ( $\chi'$ ) and out-of-phase ( $\chi''$ ) part of the ac susceptibilities measured under zero dc field for <b>3</b> . ....                                                                                                                                                                           | 18 |
| Table S4. Relaxation fitting parameters from the least-square fitting of the Cole-Cole plots of compound <b>2</b> under zero dc field according to the generalized Debye model. ....                                                                                                                                                                          | 19 |
| Table S5. Relaxation fitting parameters from the least-square fitting of the Cole-Cole plots of compound <b>3</b> under zero dc field according to the generalized Debye model. ....                                                                                                                                                                          | 20 |
| Table S6. RASSI-SO computed low-lying 21 spin-free sextet states and the spin-orbit coupled (Kramer doublets) for Dy center in monomer complex <b>1</b> . All the values are reported here in cm <sup>-1</sup> . The values in red colour are for the spin-free sextet states while the values in the blue colour are for the spin-orbit coupled states. .... | 21 |
| Table S7. RASSI-SO computed low-lying 21 spin-free sextet states and the spin-orbit coupled (Kramer doublets) for Dy@1 center in dimer complex <b>2</b> . All the values are reported here in cm <sup>-1</sup> . The values in red colour are for the spin-free sextet states while the values in the blue colour are for the spin-orbit coupled states. .... | 22 |
| Table S8. RASSI-SO computed low-lying 21 spin-free sextet states and the spin-orbit coupled (Kramer doublets) for Dy@2 center in dimer complex <b>2</b> . All the values are reported here in cm <sup>-1</sup> . The values in red colour are for the spin-free sextet states while the values in the blue colour are for the spin-orbit coupled states. .... | 23 |

|                                                                                                                                                                                                                                                                                                                                                                                                                        |    |
|------------------------------------------------------------------------------------------------------------------------------------------------------------------------------------------------------------------------------------------------------------------------------------------------------------------------------------------------------------------------------------------------------------------------|----|
| Table S9. RASSI-SO computed low-lying 21 spin-free sextet states and the spin-orbit coupled (Kramer doublets) for Dy@1 center in dimer complex 3. All the values are reported here in $\text{cm}^{-1}$ . The values in red colour are for the spin-free sextet states while the values in the blue colour are for the spin-orbit coupled states. ....                                                                  | 24 |
| Table S10. RASSI-SO computed low-lying 21 spin-free sextet states and the spin-orbit coupled (Kramer doublets) for Dy@2 center in dimer complex 3. All the values are reported here in $\text{cm}^{-1}$ . The values in red colour are for the spin-free sextet states while the values in the blue colour are for the spin-orbit coupled states. ....                                                                 | 25 |
| Table S11. SINGLE_ANISO computed g-tensors, the angle of deviation from ground state $g_{zz}$ orientation, and relative energies of eight low lying Kramers' doublets for Dy center in monomer complex 1. ....                                                                                                                                                                                                         | 26 |
| Table S12. SINGLE_ANISO computed g-tensors, the angle of deviation from ground state $g_{zz}$ orientation, and relative energies of eight low lying Kramers' doublets for Dy@1 and Dy@2 centers in dimer complex 2. ....                                                                                                                                                                                               | 26 |
| Table S13. SINGLE_ANISO computed g-tensors, the angle of deviation from ground state $g_{zz}$ orientation, and relative energies of eight low lying Kramers' doublets for Dy@1 and Dy@2 centers in dimer complex 3. ....                                                                                                                                                                                               | 27 |
| Table S14. SINGLE_ANISO computed crystal field parameters for Dy center in monomer complex 1. The major dominating values are kept in bold. ....                                                                                                                                                                                                                                                                       | 28 |
| Table S15. SINGLE_ANISO computed crystal field parameters for Dy@1 and Dy@2 centers in both dimer complexes 2 and 3 respectively. The major dominating values are kept in bold. ....                                                                                                                                                                                                                                   | 29 |
| Table S16. SINGLE_ANISO computed wave function decomposition analysis for Dy center in monomer complex 1. The major dominating values are kept in bold. ....                                                                                                                                                                                                                                                           | 30 |
| Table S17. SINGLE_ANISO computed wave function decomposition analysis for Dy@1 and Dy@2 centers in dimeric complex 2. The major dominating values are kept in bold. ....                                                                                                                                                                                                                                               | 31 |
| Table S18. SINGLE_ANISO computed wave function decomposition analysis for Dy@1 and Dy@2 centers in dimeric complex 3. The major dominating values are kept in bold. ....                                                                                                                                                                                                                                               | 32 |
| <b>Figure S10.</b> Ab initio computed magnetic relaxation pathway for the (a) Dy center in monomer complex 1; (b) Dy@1 and (c) Dy@2 centers in dimer complex 2; and (d) Dy@1 and Dy@2 centers in dimer complex 3 respectively. The grey horizontal bars indicate the KDs as magnetic moments' function. The blue, red, and green arrows represent the possible QTM/TA-QTM, Orbach, and Raman relaxation pathways. .... | 33 |
| <b>Figure S11.</b> CASSCF computed LoProp charges on the first coordinating atoms of Dy centers in (a) monomeric complex 1; (b) dimeric complex 2, and (c) dimeric complex 3 respectively. ....                                                                                                                                                                                                                        | 34 |
| <b>Figure S12.</b> Thermal dependence of the molecular magnetic susceptibility for (a) monomer complex 1; (b) dimer complex 2; (c) dimer complex 3. The grey diamond boxes are the experimental values, while the solid red lines represent the POLY_ANISO simulated data. NOTE: We have increased the simulated data by 4% to meet the experimental values in 2 and 3 respectively. ....                              | 35 |
| <b>Figure S13.</b> Magnetization at 2K for (a) dimer complex 2; (b) dimer complex 3 respectively. Solid blue lines represent the POLY_ANISO simulated data. NOTE: We have increased the simulated data by 4% to meet the experimental values. ....                                                                                                                                                                     | 36 |
| Table S19. Exchange and dipolar interaction obtained from the POLY_ANISO simulation from the best fit using the Lines model for complexes 2 and 3. ....                                                                                                                                                                                                                                                                | 37 |

|                                                                                                                                                                                                             |    |
|-------------------------------------------------------------------------------------------------------------------------------------------------------------------------------------------------------------|----|
| Table S20. Energies of the low-lying non-Kramers' exchange doublets along with $g_{zz}$ and tunneling gap obtained from POLY_ANISO simulation of complex 2.....                                             | 37 |
| Table S21. Energies of the low-lying non-Kramers' exchange doublets along with $g_{zz}$ and tunneling gap obtained from POLY_ANISO simulation of complex 3.....                                             | 38 |
| <b>Table S22.</b> BS-DFT computed energies of high-spin and broken-symmetry solution of Gd analogue of complex <b>1</b> using $H=-JS_1S_2$ formalism. All $J$ values are provided in $\text{cm}^{-1}$ ..... | 38 |
| <b>Figure S14.</b> Dimeric structure obtained from the crystal structure of complex <b>1</b> to compute the intermolecular exchange interaction. ....                                                       | 39 |
| Table S23. Basis functions used in ab initio CASSCF calculations using MOLCAS code. ....                                                                                                                    | 39 |
| Table S24. Hydrogen optimized cartesian coordinates of complexes 1-3. ....                                                                                                                                  | 40 |
| References .....                                                                                                                                                                                            | 46 |

## EXPERIMENTAL SECTION

### Physical measurements.

Infrared spectra (IR) data were measured on KBr pellets using a Nexus 870 FT-IR spectrometer in the range of 4000-400  $\text{cm}^{-1}$ . Elemental analyses of C, H, and N were performed at an Elementar Vario MICRO analyzer. Powder X-ray diffraction data (PXRD) were recorded on a Bruker D8 Advance diffractometer with Cu  $K\alpha$  X-ray source ( $\lambda = 1.54056 \text{ \AA}$ ) operated at 40 kV and 40 mA. Thermal gravimetric analysis (TGA) was measured in  $\text{Al}_2\text{O}_3$  crucibles using a PerkinElmer Thermal Analysis in the temperature range of 30-800  $^\circ\text{C}$  under an argon atmosphere. Magnetic measurements from 1.8 to 300 K with applied direct current (dc) field up to 7 T were performed using a Quantum Design SQUID VSM magnetometer on the crushed samples from the single crystals of the compound. Alternative current (ac) magnetic susceptibility data were collected in a zero-dc field in the temperature range of 2-30 K, under an ac field of 2 Oe, oscillating at frequencies in the range of 1-1000 Hz. All magnetic data were corrected for the diamagnetic contributions of the sample holder and of core diamagnetism of the sample using Pascal's constants.

### X-ray Crystallography.

Single crystal X-ray diffraction data were collected on a Bruker D8 QUEST diffractometer with a PHOTON III area detector (Mo- $K\alpha$  radiation,  $\lambda = 0.71073 \text{ \AA}$ , Bruker Ius 3.0) at 153 K. The APEX III program was used to determine the unit cell parameters and for data collection. The data were integrated and corrected for Lorentz and polarization effects using SAINT.<sup>S1</sup> Absorption corrections were applied with SADABS.<sup>S2</sup> The structures were solved by direct methods and refined by full-matrix least-squares method on  $F^2$  using the SHELXTL<sup>S3</sup> crystallographic software package integrated in Olex 2.<sup>S4</sup> All the non-hydrogen atoms were refined anisotropically. Hydrogen atoms of the organic ligands were refined as riding on the corresponding non-hydrogen atoms. Additional details of the data collections and structural refinement parameters for complexes **2** and **3** are provided in Table 1. Selected bond lengths and angles of **2** and **3** were listed in Table S3. CCDC 2160454 and 2160455 are the supplementary crystallographic data for this paper. They can be obtained freely from the Cambridge Crystallographic Data Centre via [www.ccdc.cam.ac.uk/data\\_request/cif](http://www.ccdc.cam.ac.uk/data_request/cif).

## COMPUTATIONAL DETAILS

All the analyses were performed on the X-ray crystal structures for complexes **1** and **2**, while for complex **3**, a truncated model was used to reduce the computational cost, where the terminal pyridine group of the bridging bpmo ligand was replaced with –H atom. The position of the hydrogens in complexes **1** and **2** and in the truncated model for complex **3** were optimized using ORCA/5.0.2 code<sup>S5</sup>, employing BP86<sup>S6-S7</sup> level of theory and def2-SVP<sup>S8-S9</sup> basis set (see ESI for the optimized coordinates).

All the multi-reference calculations were performed using MOLCAS 8.2 code.<sup>S10</sup> For calculations of spin-Hamiltonian parameters in Complete active space self-consistent field (CASSCF)<sup>S11</sup> framework, an active space of CAS(9,7), i.e., nine active electrons in the seven active f-orbitals of Dy<sup>III</sup> ion, was considered for all the monomer and dimer complexes. Here we have employed basis set for ANO-RCC library (see Table S23 for detailed basis set contraction scheme).<sup>S12-S13</sup> To speed up the calculations, the two-electron integrals were computed using the Resolution of Identity Cholesky decomposition (RICD) approximation.<sup>S14</sup> The single-ion properties of Dy<sup>III</sup> ion in complex **1** was proceeded normally, but for dimeric complexes **2** and **3**, the other paramagnetic ion in the respective complexes was replaced with the diamagnetic Lu<sup>III</sup> analogue. The Dy<sup>III</sup> ion has 4f<sup>9</sup> configuration and possesses a <sup>6</sup>H<sub>15/2</sub> ground state. Using the active space comprised of CAS(9,7), here we have computed 21 spin-free sextet states for all the complexes, and opted not to compute the other higher excited states, as the 21 roots is significant enough in describing the magnetic properties. The computed spin-free states for each Dy<sup>III</sup> centers were subsequently mixed using a spin-orbit restricted active space spin-interaction (SO-RASSI) to compute the spin-orbit states.<sup>S15</sup> These computed spin-orbit states were taken to the SINGLE\_ANISO module<sup>S16</sup> to extract the g-values, crystal field parameters, transition magnetic moments, magnetic susceptibility, and magnetization of individual Dy<sup>III</sup> ion in all the complexes (monomeric **1**, and dimeric **2**, & **3**). The computed relative energies of the spin-free states, spin-orbit states, and the g-values are provided here in the Supporting Information.

Also, to confirm the nature of the magnetic interaction in complex **1**, we took the monomeric crystal structure and expanded it into a dimer. Calculations were performed on the isotropic Gd(III)-Gd(III) dinuclear complex, and the *J* values were further scaled for Dy(III) by a factor of 49/25 as mentioned earlier.<sup>S17</sup> Our computed SH parameters nicely reproduce the static d.c. magnetic properties except for the very low-temperature ferromagnetic behaviour.

The sharp increase in  $\chi_{MT}$  at very low-temperature in complex **1** arises from the weak intermolecular ferromagnetic interaction and this is supported by our DFT calculations.

Lastly using POLY\_ANISO module,<sup>S18-S20</sup> dc magnetic properties were simulated to extract the magnetic exchange interaction (dipolar + exchange contribution) between the Dy<sup>III</sup> centers in dimeric complexes **2** and **3** respectively.

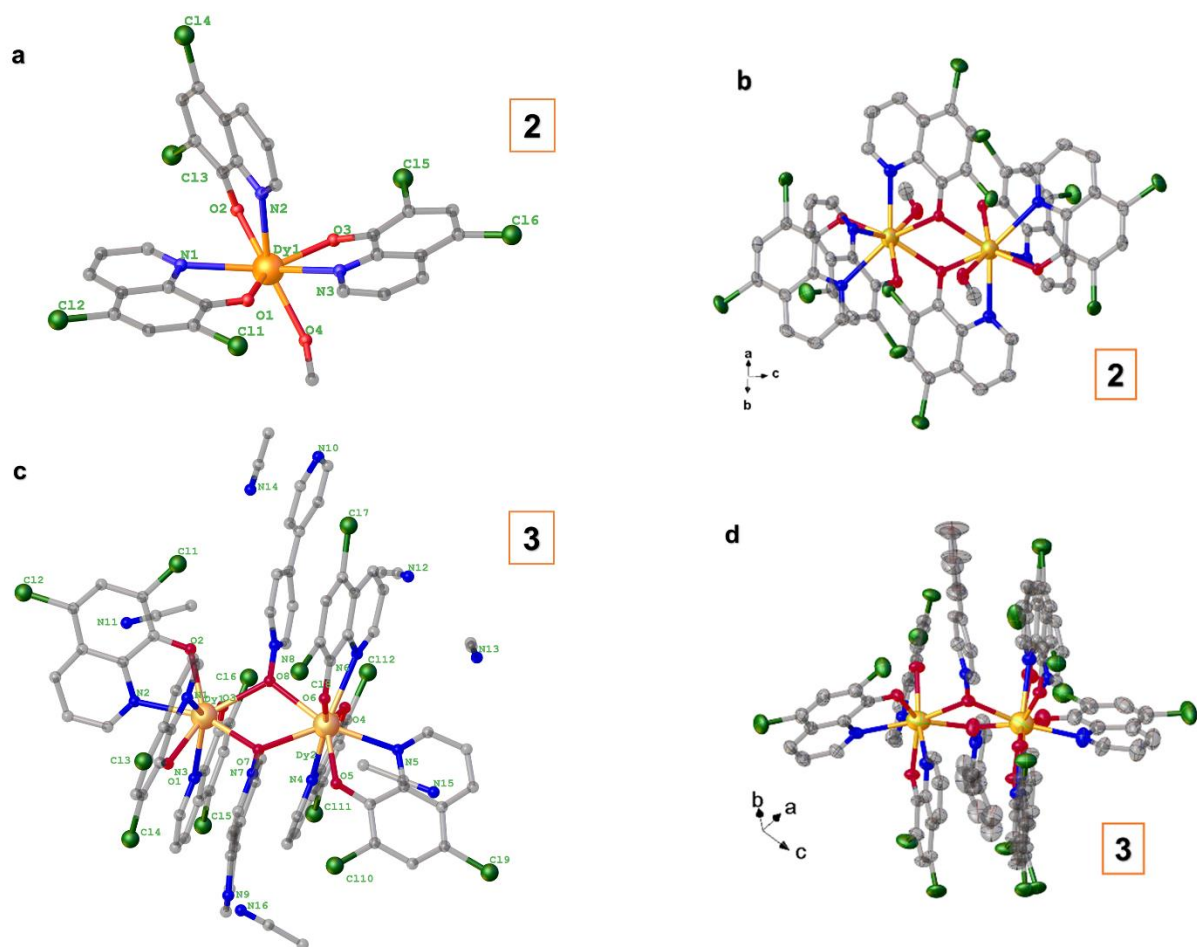

**Figure S1.** The asymmetric units of **2** (a) and **3** (c), and the complete molecule structures of **2** (b) and **3** (d) in ellipses & sticks mode.



**Table S1.** Selected bond lengths (Å) and bond angles (°) for **2**.

---

|                                  |            |
|----------------------------------|------------|
| Dy(1)-O(1)                       | 2.240(2)   |
| Dy(1)-O(2)                       | 2.314(2)   |
| Dy(1)-O(3)                       | 2.351(2)   |
| Dy(1)-O(4)                       | 2.373(2)   |
| Dy(1)-O(3) <sup>#</sup>          | 2.422(2)   |
| Dy(1)-N(1)                       | 2.623(3)   |
| Dy(1)-N(2)                       | 2.547(3)   |
| Dy(1)-N(3)                       | 2.571(3)   |
| O(3) <sup>1</sup> -Dy(1)-O(3)    | 71.69(8)   |
| O(3)-Dy(1)-O(3)                  | 65.85(8)   |
| Dy(1)- O(3)- Dy(1) <sup>#</sup>  | 108.30(8)  |
| Dy(1)- O(3) <sup>#</sup> - Dy(1) | 108.30 (8) |
| O(1)-Dy(1)-O(2)                  | 131.28(8)  |
| O(1)-Dy(1)-O(3)                  | 139.63(8)  |
| O(1)-Dy(1)-O(4)                  | 80.54(8)   |
| N(1)-Dy(1)-N(3)                  | 135.08(9)  |
| O(2)-Dy(1)-N(1)                  | 70.96(8)   |
| O(3)-Dy(1)-O(4)                  | 84.42(18)  |
| O(2)-Dy(1)-O(3)                  | 130.59(8)  |

Symmetry code <sup>#</sup> 1-X, 1-Y, -Z

---

**Table S2.** Selected bond lengths (Å) and bond angles (°) for **3**.

|                  |            |                 |            |
|------------------|------------|-----------------|------------|
| Dy(1)-O(1)       | 2.244(5)   | Dy(2)-O(4)      | 2.461(3)   |
| Dy(1)-O(2)       | 2.246(4)   | Dy(2)-O(5)      | 2.440(4)   |
| Dy(1)-O(3)       | 2.299(4)   | Dy(2)-O(6)      | 2.265(4)   |
| Dy(1)-O(4)       | 2.433(4)   | Dy(2)-O(7)      | 2.278(3)   |
| Dy(1)-O(5)       | 2.460(4)   | Dy(2)-O(8)      | 2.268(3)   |
| Dy(1)-N(1)       | 2.600(7)   | Dy(2)-N(4)      | 2.526(4)   |
| Dy(1)-N(2)       | 2.497(5)   | Dy(2)-N(5)      | 2.580(4)   |
| Dy(1)-N(3)       | 2.615(6)   | Dy(2)-N(6)      | 2.527(5)   |
| O(1)-Dy(1)-O(4)  | 108.30(15) | O(7)-Dy(2)-O(4) | 75.06(12)  |
| Dy(1)-O(7)-Dy(5) | 73.31(17)  | O(7)-Dy(2)-O(5) | 137.35(12) |
| O(1)-Dy(1)-O(2)  | 86.60(18)  | O(7)-Dy(2)-N(5) | 133.18(13) |
| O(1)-Dy(1)-O(3)  | 136.56(17) | O(4)-Dy(1)-N(6) | 140.33(13) |
| O(1)-Dy(1)-N(1)  | 66.3(2)    | O(4)-Dy(1)-N(1) | 90.38(17)  |
| O(1)-Dy(1)-N(2)  | 85.00(19)  | O(4)-Dy(1)-N(5) | 62.79(12)  |
| O(3)-Dy(1)-O(4)  | 79.46(14)  | O(4)-Dy(1)-N(2) | 159.33(15) |
| O(2)-Dy(1)-O(3)  | 123.90(17) | O(4)-Dy(1)-O(5) | 62.79(12)  |
| O(2)-Dy(1)-N(1)  | 140.46(19) | O(6)-Dy(1)-O(7) | 84.3(2)    |
| O(2)-Dy(1)-N(3)  | 68.54(16)  | N(1)-Dy(1)-N(3) | 135.5(2)   |
| O(2)-Dy(1)-N(3)  | 73.26(19)  | N(2)-Dy(1)-N(1) | 80.4(2)    |
| O(5)-Dy(1)-N(1)  | 120.35(18) | N(2)-Dy(1)-N(3) | 95.4(2)    |

**Table S3.** Continuous Shape Measure (CSM) analysis for eight-coordinated Dy<sup>3+</sup> ions in **2** and **3**.

| Eight-coordinated coordination sphere label | Shape                                          | CSM parameters |              |              | Determined coordination geometry |
|---------------------------------------------|------------------------------------------------|----------------|--------------|--------------|----------------------------------|
|                                             |                                                | <b>2</b>       | <b>3_Dy1</b> | <b>3_Dy2</b> |                                  |
| OP-8                                        | Octagon                                        | 28.723         | 33.429       | 21.358       |                                  |
| HPY-8                                       | Heptagonal pyramid                             | 22.313         | 31.551       | 23.417       |                                  |
| HBPY-8                                      | Hexagonal bipyramid                            | 15.373         | 11.728       | 8.577        |                                  |
| CU-8                                        | Cube                                           | 13.586         | 15.869       | 12.328       |                                  |
| SAPR-8                                      | Square antiprism                               | 3.574          | 3.046        | 3.141        |                                  |
| TDD-8                                       | Triangular dodecahedron (D <sub>2d</sub> )     | 2.677          | <b>2.651</b> | <b>1.494</b> | <b>TDD-8</b>                     |
| JGBF-8                                      | Johnson - Gyrobifastigium (J26)                | 12.442         | 10.847       | 27.000       |                                  |
| JETBPY-8                                    | Johnson - Elongated triangular bipyramid (J14) | 25.169         | 12.440       | 27.357       |                                  |
| JBTP-8                                      | Johnson - Biaugmented trigonal prism (J50)     | 3.034          | 4.364        | 2.737        |                                  |
| BTPR-8                                      | Biaugmented trigonal prism (C <sub>2v</sub> )  | <b>1.951</b>   | 3.364        | 2.811        | <b>BTPR-8</b>                    |
| JSD-8                                       | Snub disphenoid (J84)                          | 5.110          | 5.501        | 3.932        |                                  |
| TT-8                                        | Triakis tetrahedron                            | 14.395         | 8.673        | 13.049       |                                  |
| ETBPY-8                                     | Elongated trigonal bipyramid (see 8)           | 20.261         | 23.002       | 22.719       |                                  |

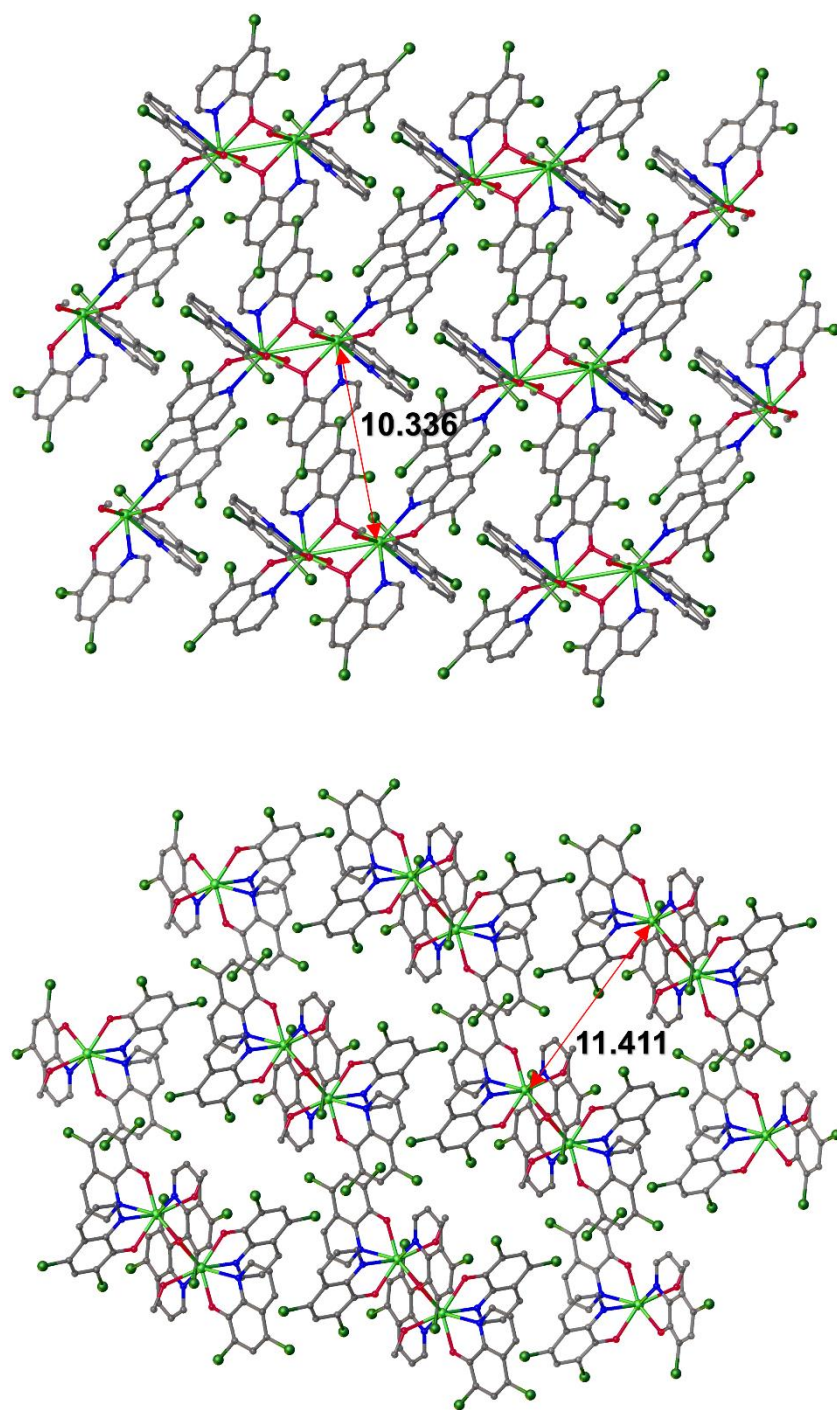

**Figure S2.** A portion of one-dimensional coordination chain structure of **2** along two main crystallographic axes: the a axis (a) and the b axis (b).

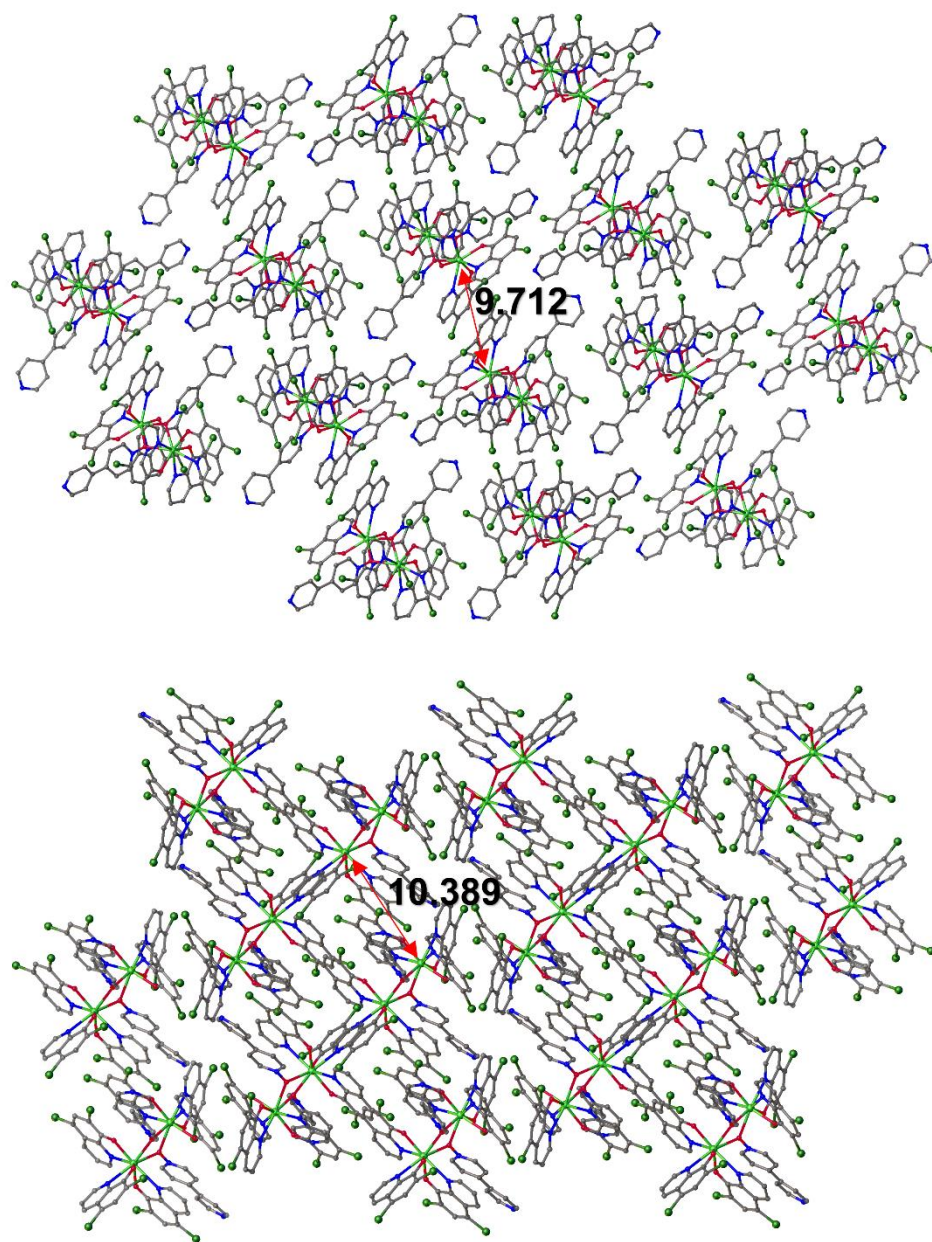

**Figure S3.** A portion of one-dimensional coordination chain structure of **3** along two main crystallographic axes: the b axis (a) and the c axis (b).

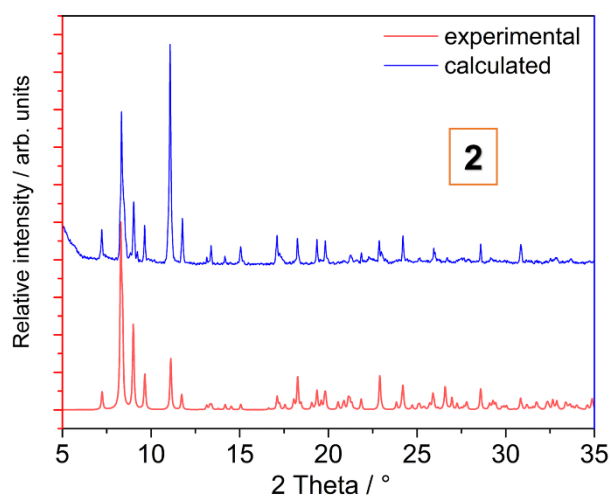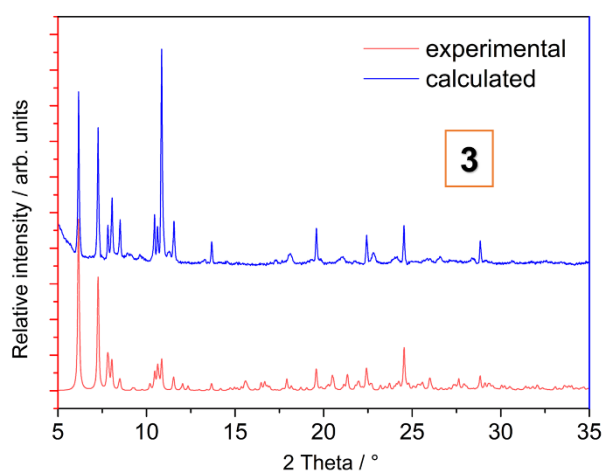

**Figure S4.** Comparison of the experimental PXRD patterns of **2** and **3** with the simulated patterns from single crystal structure. The calculated patterns were generated from Mercury using the CIF of the crystal structure.

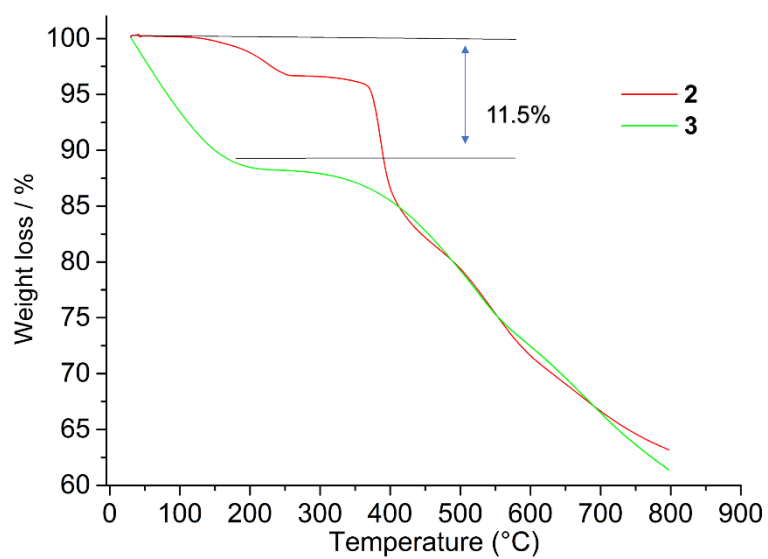

**Figure S5.** TGA curves of **2** and **3** measured under the Argon atmosphere upon the continuous heating with the  $10\text{ }^{\circ}\text{C}\cdot\text{min}^{-1}$  rate.

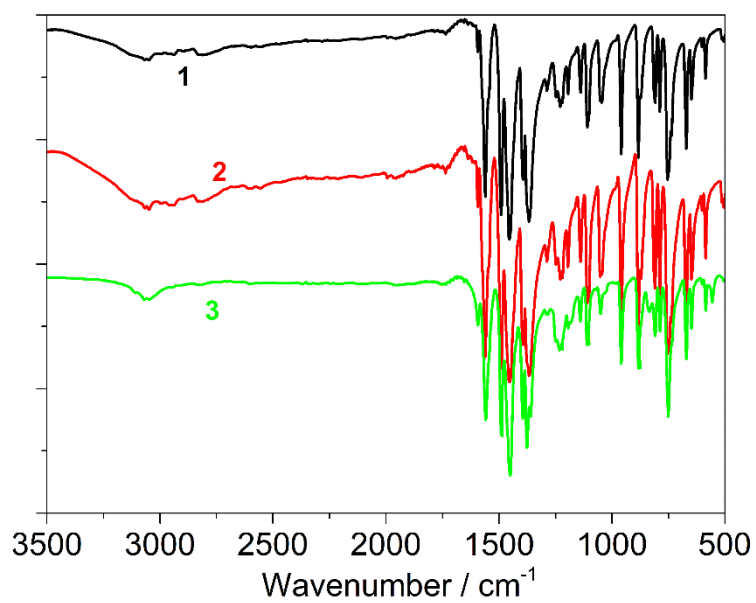

**Figure S6.** IR spectra of complexes **1**, **2** and **3**.

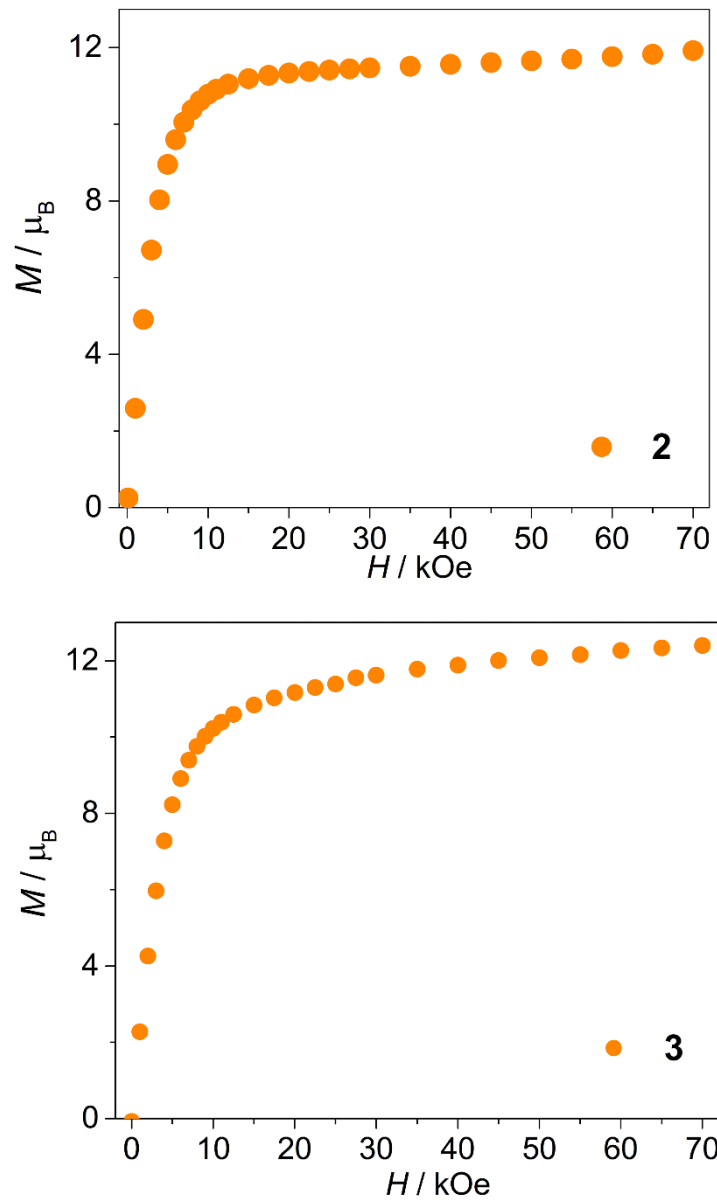

**Figure S7.** Variable-field magnetization at 2 K for **2** (up) and **3** (down).



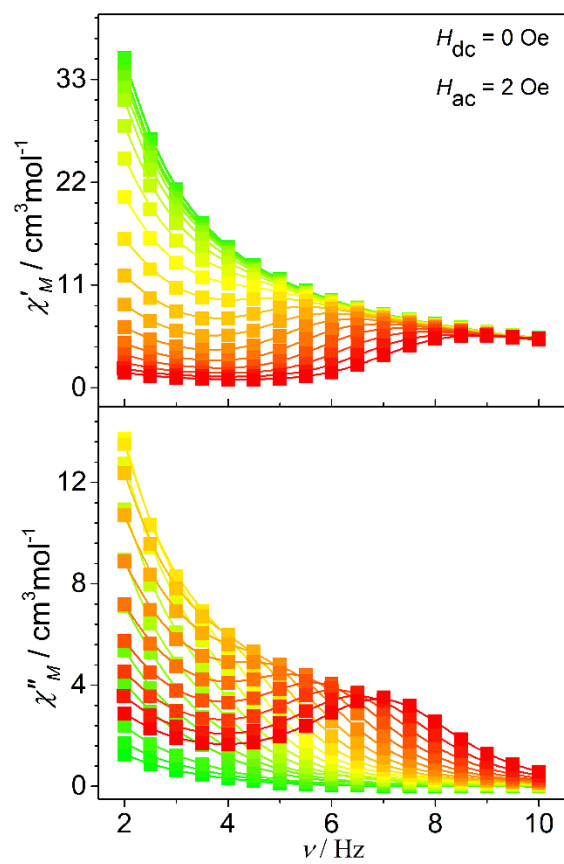

**Figure S8.** Temperature dependence of the in-phase ( $\chi'$ ) and out-of-phase ( $\chi''$ ) part of the ac susceptibilities measured under zero dc field for **2**.

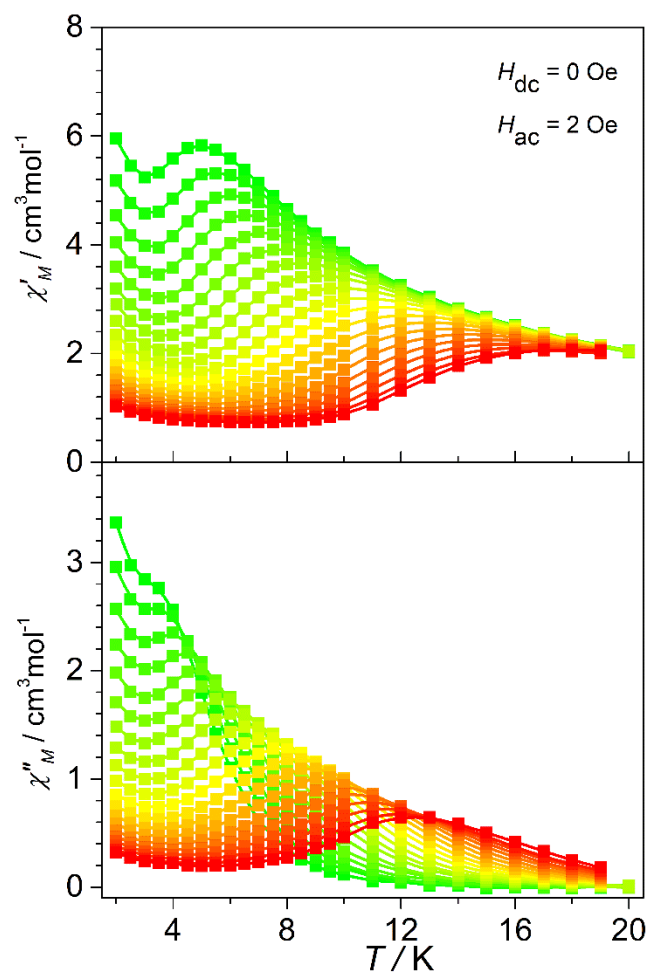

**Figure S9.** Temperature dependence of the in-phase ( $\chi'$ ) and out-of-phase ( $\chi''$ ) part of the ac susceptibilities measured under zero dc field for **3**.

**Table S4.** Relaxation fitting parameters from the least-square fitting of the Cole-Cole plots of compound **2** under zero dc field according to the generalized Debye model.

| T / K | $\chi_S / \text{cm}^3\text{mol}^{-1}\text{K}$ | $\chi_T / \text{cm}^3\text{mol}^{-1}\text{K}$ | $\tau / \text{s}$ | $\alpha$ |
|-------|-----------------------------------------------|-----------------------------------------------|-------------------|----------|
| 2     | 0.99552                                       | 35.7359                                       | 0.00349           | 0.15255  |
| 2.5   | 0.75456                                       | 26.9323                                       | 0.00325           | 0.15116  |
| 3     | 0.61482                                       | 21.4612                                       | 0.003             | 0.14947  |
| 3.5   | 0.54421                                       | 17.7841                                       | 0.00264           | 0.14176  |
| 4     | 0.46697                                       | 15.1422                                       | 0.00214           | 0.13107  |
| 4.5   | 0.38649                                       | 13.1158                                       | 0.00157           | 0.11519  |
| 5     | 0.28305                                       | 11.5667                                       | 0.00106           | 0.10339  |
| 5.5   | 0.14171                                       | 10.3488                                       | 6.8899E-4         | 0.09915  |
| 6     | 2.64889E-15                                   | 9.35583                                       | 4.40907E-4        | 0.0995   |
| 6.5   | 4.2425E-15                                    | 8.53939                                       | 2.8723E-4         | 0.09565  |
| 7     | 5.98864E-15                                   | 7.8498                                        | 1.86376E-4        | 0.09598  |
| 7.5   | 1.10377E-14                                   | 7.27112                                       | 1.20701E-4        | 0.10157  |

**Table S5.** Relaxation fitting parameters from the least-square fitting of the Cole-Cole plots of compound **3** under zero dc field according to the generalized Debye model.

| T / K | $\chi_S / \text{cm}^3\text{mol}^{-1}\text{K}$ | $\chi_T / \text{cm}^3\text{mol}^{-1}\text{K}$ | $\tau / \text{s}$ | $\alpha$ |
|-------|-----------------------------------------------|-----------------------------------------------|-------------------|----------|
| 4     | 0.61363                                       | 20.0792                                       | 1.42768           | 0.5271   |
| 4.5   | 0.69526                                       | 12.0725                                       | 0.25575           | 0.44148  |
| 5     | 0.70235                                       | 9.56305                                       | 0.11473           | 0.39137  |
| 5.5   | 0.68936                                       | 8.17385                                       | 0.06449           | 0.35693  |
| 6     | 0.66831                                       | 7.23857                                       | 0.04037           | 0.33388  |
| 6.5   | 0.64546                                       | 6.56804                                       | 0.02677           | 0.32036  |
| 7     | 0.62008                                       | 6.03673                                       | 0.01852           | 0.31381  |
| 7.5   | 0.60462                                       | 5.58438                                       | 0.01308           | 0.30312  |
| 8     | 0.58302                                       | 5.20952                                       | 0.00942           | 0.30104  |
| 8.5   | 0.57087                                       | 4.89198                                       | 0.00691           | 0.29901  |
| 9     | 0.55219                                       | 4.61368                                       | 0.00506           | 0.30003  |
| 9.5   | 0.5412                                        | 4.35761                                       | 0.00373           | 0.30365  |
| 10    | 0.52897                                       | 4.14935                                       | 0.00277           | 0.31248  |
| 11    | 0.51939                                       | 3.94914                                       | 0.00201           | 0.32102  |
| 12    | 0.52198                                       | 3.61075                                       | 0.00109           | 0.34454  |
| 13    | 0.58327                                       | 3.31572                                       | 6.13652E-4        | 0.36259  |
| 14    | 0.64933                                       | 3.07554                                       | 3.51084E-4        | 0.37682  |
| 15    | 0.70607                                       | 2.8598                                        | 1.94661E-4        | 0.38856  |

**Table S6.** RASSI-SO computed low-lying 21 spin-free sextet states and the spin-orbit coupled (Kramer doublets) for Dy center in monomer complex **1**. All the values are reported here in  $\text{cm}^{-1}$ . The values in red colour are for the spin-free sextet states while the values in the blue colour are for the spin-orbit coupled states.

| <b>Dy</b>               |                                  |         |
|-------------------------|----------------------------------|---------|
| <b>SPIN-FREE STATES</b> | <b>SPIN-ORBIT COUPLED STATES</b> |         |
| 0.0                     | 0.0                              | 9666.8  |
| 17.4                    | 57.6                             | 9715.8  |
| 86.9                    | 94.5                             | 9778.2  |
| 116.6                   | 137.9                            | 9853.8  |
| 130.6                   | 188.2                            | 11007.5 |
| 253.7                   | 244.1                            | 11159.9 |
| 275.8                   | 331.9                            | 11248.6 |
| 355.3                   | 420.9                            | 11752.1 |
| 380.0                   | 3029.3                           | 11775.8 |
| 480.7                   | 3087.9                           | 11798.3 |
| 496.1                   | 3122.9                           | 11817.5 |
| 7531.8                  | 3173.9                           | 11837.2 |
| 7560.5                  | 3224.9                           | 13539.2 |
| 7628.9                  | 3264.5                           | 13558.8 |
| 7688.1                  | 3302.5                           | 13610.0 |
| 7722.8                  | 5640.9                           | 13633.6 |
| 7739.3                  | 5695.3                           | 14951.4 |
| 7752.8                  | 5742.6                           | 14971.2 |
| 34649.0                 | 5789.8                           | 15011.2 |
| 34863.0                 | 5814.4                           | 15972.3 |
| 35047.5                 | 5875.9                           | 15979.9 |
|                         | 7851.6                           | 16573.2 |
|                         | 7893.0                           | 38678.3 |
|                         | 7953.7                           | 38738.7 |
|                         | 7983.9                           | 38791.4 |
|                         | 8058.8                           | 38886.7 |
|                         | 9523.4                           | 40069.4 |
|                         | 9557.0                           | 40181.4 |
|                         | 9586.6                           | 40306.8 |
|                         | 9613.2                           | 41165.5 |
|                         | 9625.9                           | 41210.6 |
|                         | 9652.2                           |         |

**Table S7.** RASSI-SO computed low-lying 21 spin-free sextet states and the spin-orbit coupled (Kramer doublets) for Dy@1 center in dimer complex **2**. All the values are reported here in  $\text{cm}^{-1}$ . The values in red colour are for the spin-free sextet states while the values in the blue colour are for the spin-orbit coupled states.

| Dy@1             |                           |         |
|------------------|---------------------------|---------|
| SPIN-FREE STATES | SPIN-ORBIT COUPLED STATES |         |
| 0.0              | 0.0                       | 9837.8  |
| 18.8             | 99.6                      | 9877.6  |
| 129.5            | 163.7                     | 9927.0  |
| 161.7            | 257.5                     | 10149.8 |
| 229.1            | 354.4                     | 11065.2 |
| 285.2            | 434.9                     | 11266.5 |
| 442.4            | 593.5                     | 11571.8 |
| 567.2            | 777.8                     | 11890.8 |
| 591.6            | 3044.1                    | 11932.1 |
| 823.3            | 3149.4                    | 11970.5 |
| 830.4            | 3247.9                    | 11997.2 |
| 7629.5           | 3293.9                    | 12016.2 |
| 7709.9           | 3372.2                    | 13705.5 |
| 7762.0           | 3493.4                    | 13729.1 |
| 7820.7           | 3669.3                    | 13764.6 |
| 7877.9           | 5679.6                    | 13802.2 |
| 7912.1           | 5789.1                    | 15122.1 |
| 7928.8           | 5848.8                    | 15136.1 |
| 34597.2          | 5928.5                    | 15173.5 |
| 34894.4          | 6025.1                    | 16125.0 |
| 35506.5          | 6201.1                    | 16158.7 |
|                  | 7905.7                    | 16745.9 |
|                  | 8005.6                    | 38681.9 |
|                  | 8062.8                    | 38822.1 |
|                  | 8174.2                    | 38935.5 |
|                  | 8354.1                    | 39122.4 |
|                  | 9628.4                    | 40111.5 |
|                  | 9683.3                    | 40301.9 |
|                  | 9724.4                    | 40702.0 |
|                  | 9742.3                    | 41372.2 |
|                  | 9781.1                    | 41462.7 |
|                  | 9815.7                    |         |

**Table S8.** RASSI-SO computed low-lying 21 spin-free sextet states and the spin-orbit coupled (Kramer doublets) for Dy@2 center in dimer complex **2**. All the values are reported here in  $\text{cm}^{-1}$ . The values in red colour are for the spin-free sextet states while the values in the blue colour are for the spin-orbit coupled states.

| <b>Dy@2</b>             |                                  |         |
|-------------------------|----------------------------------|---------|
| <b>SPIN-FREE STATES</b> | <b>SPIN-ORBIT COUPLED STATES</b> |         |
| 0.0                     | 0.0                              | 9837.7  |
| 18.7                    | 99.5                             | 9877.5  |
| 129.3                   | 163.5                            | 9926.9  |
| 161.5                   | 257.4                            | 10149.7 |
| 228.9                   | 354.3                            | 11065.2 |
| 285.1                   | 434.9                            | 11266.4 |
| 442.3                   | 593.5                            | 11571.7 |
| 567.1                   | 777.7                            | 11890.7 |
| 591.5                   | 3044.0                           | 11932.0 |
| 823.2                   | 3149.3                           | 11970.4 |
| 830.3                   | 3247.8                           | 11997.1 |
| 7629.4                  | 3293.7                           | 12016.0 |
| 7709.8                  | 3372.1                           | 13705.4 |
| 7761.9                  | 3493.3                           | 13729.0 |
| 7820.6                  | 3669.2                           | 13764.5 |
| 7877.8                  | 5679.5                           | 13802.1 |
| 7911.9                  | 5789.0                           | 15122.0 |
| 7928.7                  | 5848.7                           | 15136.0 |
| 34597.2                 | 5928.4                           | 15173.4 |
| 34894.1                 | 6025.0                           | 16124.9 |
| 35506.4                 | 6201.0                           | 16158.6 |
|                         | 7905.7                           | 16745.8 |
|                         | 8005.5                           | 38681.8 |
|                         | 8062.7                           | 38822.0 |
|                         | 8174.1                           | 38935.5 |
|                         | 8354.1                           | 39122.2 |
|                         | 9628.3                           | 40111.3 |
|                         | 9683.2                           | 40301.7 |
|                         | 9724.3                           | 40701.9 |
|                         | 9742.2                           | 41372.1 |
|                         | 9781.0                           | 41462.6 |
|                         | 9815.6                           |         |

**Table S9.** RASSI-SO computed low-lying 21 spin-free sextet states and the spin-orbit coupled (Kramer doublets) for Dy@1 center in dimer complex **3**. All the values are reported here in  $\text{cm}^{-1}$ . The values in red colour are for the spin-free sextet states while the values in the blue colour are for the spin-orbit coupled states.

| <b>Dy@1</b>             |                                  |         |
|-------------------------|----------------------------------|---------|
| <b>SPIN-FREE STATES</b> | <b>SPIN-ORBIT COUPLED STATES</b> |         |
| 0.0                     | 0.0                              | 9777.5  |
| 21.3                    | 51.7                             | 9831.6  |
| 75.0                    | 179.3                            | 9892.9  |
| 96.2                    | 251.2                            | 9998.4  |
| 228.8                   | 312.9                            | 11045.5 |
| 325.9                   | 364.6                            | 11251.0 |
| 354.7                   | 439.7                            | 11402.9 |
| 469.3                   | 611.4                            | 11835.1 |
| 494.5                   | 3029.0                           | 11870.1 |
| 653.2                   | 3145.4                           | 11905.3 |
| 669.6                   | 3203.7                           | 11934.4 |
| 7564.6                  | 3272.4                           | 11948.8 |
| 7666.7                  | 3339.8                           | 13622.2 |
| 7680.9                  | 3391.3                           | 13672.6 |
| 7753.9                  | 3474.9                           | 13716.7 |
| 7803.0                  | 5645.9                           | 13733.5 |
| 7845.7                  | 5780.7                           | 15051.9 |
| 7860.7                  | 5821.3                           | 15072.6 |
| 34564.1                 | 5886.9                           | 15111.2 |
| 35023.1                 | 5961.0                           | 16070.0 |
| 35204.2                 | 6017.6                           | 16083.6 |
|                         | 7864.7                           | 16676.7 |
|                         | 7989.8                           | 38707.0 |
|                         | 8036.7                           | 38770.5 |
|                         | 8118.7                           | 38860.7 |
|                         | 8188.4                           | 39065.1 |
|                         | 9593.3                           | 40113.5 |
|                         | 9635.8                           | 40309.3 |
|                         | 9663.9                           | 40472.1 |
|                         | 9697.4                           | 41270.1 |
|                         | 9707.5                           | 41345.1 |
|                         | 9743.2                           |         |



**Table S10.** RASSI-SO computed low-lying 21 spin-free sextet states and the spin-orbit coupled (Kramer doublets) for Dy@2 center in dimer complex **3**. All the values are reported here in  $\text{cm}^{-1}$ . The values in red colour are for the spin-free sextet states while the values in the blue colour are for the spin-orbit coupled states.

| <b>Dy@2</b>             |                                  |         |
|-------------------------|----------------------------------|---------|
| <b>SPIN-FREE STATES</b> | <b>SPIN-ORBIT COUPLED STATES</b> |         |
| 0.0                     | 0.0                              | 9782.7  |
| 5.5                     | 94.9                             | 9844.6  |
| 120.3                   | 193.3                            | 9870.3  |
| 143.3                   | 268.9                            | 10037.2 |
| 249.1                   | 332.5                            | 11069.0 |
| 357.0                   | 421.0                            | 11260.1 |
| 394.5                   | 469.0                            | 11441.1 |
| 491.6                   | 623.7                            | 11861.0 |
| 503.2                   | 3051.0                           | 11893.4 |
| 652.2                   | 3165.1                           | 11911.4 |
| 667.6                   | 3230.5                           | 11943.7 |
| 7610.2                  | 3299.2                           | 11967.3 |
| 7631.2                  | 3339.8                           | 13656.6 |
| 7719.5                  | 3402.7                           | 13674.6 |
| 7790.5                  | 3526.0                           | 13729.2 |
| 7817.2                  | 5682.5                           | 13755.6 |
| 7845.1                  | 5802.1                           | 15067.3 |
| 7861.2                  | 5840.7                           | 15092.2 |
| 34608.5                 | 5892.7                           | 15129.7 |
| 34921.6                 | 5950.2                           | 16085.6 |
| 35286.9                 | 6078.5                           | 16103.7 |
|                         | 7906.3                           | 16693.8 |
|                         | 8010.2                           | 38705.7 |
|                         | 8042.6                           | 38805.5 |
|                         | 8106.3                           | 38889.9 |
|                         | 8245.0                           | 39053.2 |
|                         | 9612.2                           | 40117.2 |
|                         | 9661.4                           | 40280.7 |
|                         | 9698.3                           | 40527.4 |
|                         | 9721.8                           | 41288.7 |
|                         | 9743.9                           | 41361.8 |
|                         | 9769.1                           |         |

**Table S11.** SINGLE\_ANISO computed g-tensors, the angle of deviation from ground state  $g_{zz}$  orientation, and relative energies of eight low lying Kramers' doublets for Dy center in monomer complex **1**.

| <b>Dy</b>                      |          |          |          |                    |
|--------------------------------|----------|----------|----------|--------------------|
| KDs Energy (cm <sup>-1</sup> ) | $g_{xx}$ | $g_{yy}$ | $g_{zz}$ | $\theta$ (° angle) |
| 0.0                            | 0.2480   | 0.6467   | 18.5807  | 0.0                |
| 57.6                           | 1.7523   | 2.8039   | 14.1775  | 17.0               |
| 94.5                           | 2.9003   | 3.8871   | 12.4226  | 42.9               |
| 137.9                          | 1.7043   | 4.3565   | 9.3575   | 82.3               |
| 188.2                          | 1.2167   | 1.5813   | 14.1226  | 94.6               |
| 244.1                          | 0.1385   | 0.2093   | 18.4399  | 54.3               |
| 331.9                          | 0.0239   | 0.1171   | 19.2682  | 100.0              |
| 420.9                          | 0.0329   | 0.0835   | 19.6826  | 68.3               |

**Table S12.** SINGLE\_ANISO computed g-tensors, the angle of deviation from ground state  $g_{zz}$  orientation, and relative energies of eight low lying Kramers' doublets for Dy@1 and Dy@2 centers in dimer complex **2**.

| <b>Dy@1</b>                    |          |          |          |                    | <b>Dy@2</b>                    |          |          |          |
|--------------------------------|----------|----------|----------|--------------------|--------------------------------|----------|----------|----------|
| KDs Energy (cm <sup>-1</sup> ) | $g_{xx}$ | $g_{yy}$ | $g_{zz}$ | $\theta$ (° angle) | KDs Energy (cm <sup>-1</sup> ) | $g_{xx}$ | $g_{yy}$ | $g_{zz}$ |
| 0.0                            | 0.0254   | 0.0484   | 19.6737  | 0.0                | 0.0                            | 0.0254   | 0.0484   | 19.6699  |
| 99.6                           | 0.1771   | 0.3674   | 16.5527  | 8.4                | 99.5                           | 0.1789   | 0.3709   | 16.5485  |
| 163.7                          | 0.7027   | 1.2453   | 15.5833  | 127.6              | 163.5                          | 0.7007   | 1.2471   | 15.5760  |
| 257.5                          | 1.1685   | 3.1266   | 10.2062  | 23.7               | 257.4                          | 1.1727   | 3.1300   | 10.2020  |
| 354.4                          | 7.0753   | 5.6282   | 3.7901   | 83.2               | 354.3                          | 7.0800   | 5.6257   | 3.7910   |
| 434.9                          | 1.8167   | 3.7845   | 13.0162  | 85.2               | 434.9                          | 1.8134   | 3.7784   | 13.0227  |
| 593.5                          | 0.1127   | 0.1756   | 17.3443  | 92.0               | 593.5                          | 0.1126   | 0.1757   | 17.3436  |
| 777.8                          | 0.0080   | 0.0124   | 19.7265  | 83.0               | 777.7                          | 0.0080   | 0.0124   | 19.7236  |

NOTE: The angle of deviation from the ground state  $g_{zz}$  orientation for both the Dy centers was of the same magnitude, as the complex **2** is centrosymmetric.

**Table S13.** SINGLE\_ANISO computed g-tensors, the angle of deviation from ground state  $g_{zz}$  orientation, and relative energies of eight low lying Kramers' doublets for Dy@1 and Dy@2 centers in dimer complex **3**.

| <b>Dy@1</b>                    |          |          |          |                    |
|--------------------------------|----------|----------|----------|--------------------|
| KDs Energy (cm <sup>-1</sup> ) | $g_{xx}$ | $g_{yy}$ | $g_{zz}$ | $\theta$ (° angle) |
| 0.0                            | 0.0913   | 0.2271   | 19.1102  | 0.0                |
| 51.7                           | 0.0216   | 0.2364   | 17.0380  | 8.5                |
| 179.3                          | 1.1409   | 1.2443   | 15.0004  | 19.7               |
| 251.2                          | 5.0226   | 5.9569   | 9.1270   | 36.3               |
| 312.9                          | 1.8906   | 3.7837   | 11.6121  | 97.0               |
| 364.6                          | 0.1930   | 0.4813   | 17.0501  | 90.9               |
| 439.7                          | 0.0857   | 0.1999   | 19.5269  | 79.3               |
| 611.4                          | 0.0177   | 0.0323   | 19.8246  | 106.3              |
| <b>Dy@2</b>                    |          |          |          |                    |
| KDs Energy (cm <sup>-1</sup> ) | $g_{xx}$ | $g_{yy}$ | $g_{zz}$ | $\theta$ (° angle) |
| 0.0                            | 0.0083   | 0.0141   | 19.7057  | 0.0                |
| 94.9                           | 0.0310   | 0.0435   | 17.9333  | 35.0               |
| 193.3                          | 0.3003   | 0.3681   | 13.7816  | 28.2               |
| 268.9                          | 3.1558   | 4.7047   | 9.2111   | 38.1               |
| 332.5                          | 3.3438   | 5.0141   | 10.1447  | 90.5               |
| 421.0                          | 0.1057   | 0.5768   | 15.5528  | 108.6              |
| 469.0                          | 0.1863   | 0.5527   | 17.5004  | 85.2               |
| 623.7                          | 0.0063   | 0.0116   | 19.7976  | 114.4              |

**Table S14.** SINGLE\_ANISO computed crystal field parameters for Dy center in monomer complex **1**. The major dominating values are kept in bold.

| <b>k</b> | <b>q</b>         | $B_k^q$          |
|----------|------------------|------------------|
|          |                  | <b>Dy</b>        |
| 2        | -2               | -6.70E-01        |
|          | -1               | <b>-2.10E+00</b> |
|          | 0                | <b>-1.30E+00</b> |
|          | 1                | -3.40E-01        |
|          | 2                | <b>1.50E+00</b>  |
| 4        | -4               | 5.20E-03         |
|          | -3               | <b>-4.70E-02</b> |
|          | -2               | <b>-1.00E-02</b> |
|          | -1               | <b>1.90E-02</b>  |
|          | 0                | -1.10E-03        |
|          | 1                | <b>-1.00E-02</b> |
|          | 2                | 7.50E-03         |
| 3        | <b>-4.20E-02</b> |                  |
| 4        | <b>-2.70E-02</b> |                  |
| 6        | -6               | 8.50E-05         |
|          | -5               | <b>3.30E-04</b>  |
|          | -4               | -5.10E-05        |
|          | -3               | <b>1.90E-04</b>  |
|          | -2               | <b>1.70E-04</b>  |
|          | -1               | -8.50E-05        |
|          | 0                | -5.00E-07        |
|          | 1                | <b>1.00E-04</b>  |
|          | 2                | 6.30E-05         |
|          | 3                | <b>-1.00E-04</b> |
|          | 4                | <b>-1.00E-04</b> |
| 5        | <b>-2.50E-04</b> |                  |
| 6        | -4.10E-05        |                  |

**Table S15.** SINGLE\_ANISO computed crystal field parameters for Dy@1 and Dy@2 centers in both dimer complexes **2** and **3** respectively. The major dominating values are kept in bold.

| <b>k</b> | <b>q</b>         | $B_k^q$          | $B_k^q$          | $B_k^q$          | $B_k^q$          |
|----------|------------------|------------------|------------------|------------------|------------------|
|          |                  | <b>Complex 2</b> |                  | <b>Complex 3</b> |                  |
|          |                  | <b>Dy@1</b>      | <b>Dy@2</b>      | <b>Dy@1</b>      | <b>Dy@2</b>      |
| 2        | -2               | <b>2.10E+00</b>  | <b>2.10E+00</b>  | 7.60E-01         | -6.90E-01        |
|          | -1               | <b>-1.20E+00</b> | <b>-1.20E+00</b> | <b>1.20E+00</b>  | <b>2.80E+00</b>  |
|          | 0                | <b>-3.00E+00</b> | <b>-3.00E+00</b> | <b>-2.60E+00</b> | <b>-2.20E+00</b> |
|          | 1                | -6.50E-01        | -6.60E-01        | <b>2.90E+00</b>  | <b>-2.40E+00</b> |
|          | 2                | <b>4.10E+00</b>  | <b>4.10E+00</b>  | 9.20E-01         | <b>2.80E+00</b>  |
| 4        | -4               | 7.50E-03         | 7.50E-03         | 3.30E-03         | -9.60E-03        |
|          | -3               | <b>4.00E-02</b>  | <b>4.00E-02</b>  | <b>4.30E-02</b>  | -4.60E-04        |
|          | -2               | -6.60E-03        | -6.60E-03        | -3.00E-03        | 8.10E-03         |
|          | -1               | <b>1.20E-02</b>  | <b>1.20E-02</b>  | <b>-1.10E-02</b> | <b>-1.70E-02</b> |
|          | 0                | -1.00E-03        | -1.00E-03        | 5.10E-04         | -3.30E-03        |
|          | 1                | 4.30E-03         | 4.30E-03         | <b>-1.80E-02</b> | -7.10E-04        |
|          | 2                | 3.10E-03         | 3.10E-03         | <b>1.30E-02</b>  | <b>1.50E-02</b>  |
|          | 3                | <b>-6.30E-02</b> | <b>-6.30E-02</b> | <b>-5.10E-02</b> | <b>-7.20E-02</b> |
| 4        | <b>1.00E-02</b>  | <b>1.00E-02</b>  | <b>-2.70E-02</b> | 2.00E-03         |                  |
| 6        | -6               | -2.40E-05        | -2.40E-05        | <b>-1.20E-04</b> | -3.10E-05        |
|          | -5               | 1.30E-05         | 2.00E-05         | <b>3.10E-04</b>  | <b>-2.80E-04</b> |
|          | -4               | 1.60E-05         | 1.60E-05         | -5.80E-06        | -8.60E-05        |
|          | -3               | -4.20E-04        | -4.20E-04        | <b>-3.50E-04</b> | <b>-1.30E-04</b> |
|          | -2               | -9.40E-05        | -9.40E-05        | -2.10E-05        | <b>-1.10E-04</b> |
|          | -1               | -1.10E-04        | -1.10E-04        | -2.60E-05        | <b>-1.00E-04</b> |
|          | 0                | 1.50E-05         | 1.50E-05         | 2.40E-05         | 1.10E-06         |
|          | 1                | -3.60E-05        | -3.60E-05        | 5.90E-05         | <b>1.90E-04</b>  |
|          | 2                | 3.10E-05         | 3.10E-05         | <b>1.40E-04</b>  | <b>-1.00E-04</b> |
|          | 3                | 1.60E-04         | 1.60E-04         | <b>3.60E-04</b>  | 1.80E-05         |
|          | 4                | 1.00E-04         | 1.00E-04         | -1.30E-06        | <b>1.00E-04</b>  |
| 5        | <b>-1.10E-03</b> | <b>-1.10E-03</b> | <b>-4.70E-04</b> | <b>-6.10E-04</b> |                  |
| 6        | -1.90E-05        | -1.90E-05        | <b>1.40E-04</b>  | -5.80E-05        |                  |

**Table S16.** SINGLE\_ANISO computed wave function decomposition analysis for Dy center in monomer complex **1**. The major dominating values are kept in bold.

| $\pm mJ$ | wave function decomposition analysis <b>Dy</b>                                                                                                                                                                     |
|----------|--------------------------------------------------------------------------------------------------------------------------------------------------------------------------------------------------------------------|
| KD1      | <b>82.0%</b> $ \pm 15/2\rangle$ + 10.7% $ \pm 11/2\rangle$ + 4.5% $ \pm 7/2\rangle$                                                                                                                                |
| KD2      | <b>58.3%</b> $ \pm 13/2\rangle$ + 20.6% $ \pm 9/2\rangle$ + 10.2% $ \pm 5/2\rangle$                                                                                                                                |
| KD3      | <b>25.4%</b> $ \pm 11/2\rangle$ + 22.3% $ \pm 7/2\rangle$ + 14.1% $ \pm 13/2\rangle$ + 8.6% $ \pm 3/2\rangle$ + 8.5% $ \pm 15/2\rangle$ + 8.3% $ \pm 9/2\rangle$ + 7.4% $ \pm 5/2\rangle$ + 5.1% $ \pm 1/2\rangle$ |
| KD4      | <b>20.5%</b> $ \pm 11/2\rangle$ + 17.0% $ \pm 3/2\rangle$ + 15.8% $ \pm 5/2\rangle$ + 14.5% $ \pm 9/2\rangle$ + 11.9% $ \pm 1/2\rangle$ + 9.3% $ \pm 7/2\rangle$ + 7.8% $ \pm 13/2\rangle$                         |
| KD5      | <b>23.0%</b> $ \pm 1/2\rangle$ + 21.8% $ \pm 3/2\rangle$ + 20.4% $ \pm 5/2\rangle$ + 15.1% $ \pm 7/2\rangle$ + 6.3% $ \pm 9/2\rangle$ + 6.3% $ \pm 11/2\rangle$ + 5.2% $ \pm 13/2\rangle$                          |
| KD6      | <b>28.2%</b> $ \pm 9/2\rangle$ + 24.9% $ \pm 11/2\rangle$ + 12.8% $ \pm 7/2\rangle$ + 11.5% $ \pm 13/2\rangle$ + 10.4% $ \pm 1/2\rangle$ + 6.0% $ \pm 3/2\rangle$                                                  |
| KD7      | <b>34.2%</b> $ \pm 1/2\rangle$ + 23.9% $ \pm 3/2\rangle$ + 17.4% $ \pm 5/2\rangle$ + 14.0% $ \pm 7/2\rangle$ + 7.3% $ \pm 9/2\rangle$                                                                              |
| KD8      | <b>24.4%</b> $ \pm 5/2\rangle$ + 20.5% $ \pm 7/2\rangle$ + 20.0% $ \pm 3/2\rangle$ + 13.4% $ \pm 9/2\rangle$ + 11.9% $ \pm 1/2\rangle$ + 7.0% $ \pm 11/2\rangle$                                                   |

**Table S17.** SINGLE\_ANISO computed wave function decomposition analysis for Dy@1 and Dy@2 centers in dimeric complex **2**. The major dominating values are kept in bold.

|          |                                                                                                                                                                  |
|----------|------------------------------------------------------------------------------------------------------------------------------------------------------------------|
| $\pm mJ$ | <i>wave function decomposition analysis Dy@1</i>                                                                                                                 |
| KD1      | <b>94.9%</b> $ \pm 15/2\rangle$ + 4.6% $ \pm 11/2\rangle$                                                                                                        |
| KD2      | <b>85.7%</b> $ \pm 13/2\rangle$ + 10.5% $ \pm 9/2\rangle$                                                                                                        |
| KD3      | <b>26.7%</b> $ \pm 11/2\rangle$ + 21.0% $ \pm 7/2\rangle$ + 15.8% $ \pm 5/2\rangle$ + 12.9% $ \pm 3/2\rangle$ + 8.7% $ \pm 9/2\rangle$ + 7.7% $ \pm 1/2\rangle$  |
| KD4      | <b>51.6%</b> $ \pm 11/2\rangle$ + 18.2% $ \pm 1/2\rangle$ + 12.3% $ \pm 3/2\rangle$ + 7.7% $ \pm 5/2\rangle$ + 5.5% $ \pm 9/2\rangle$                            |
| KD5      | <b>43.9%</b> $ \pm 9/2\rangle$ + 17.4% $ \pm 1/2\rangle$ + 13.6% $ \pm 3/2\rangle$ + 9.1% $ \pm 5/2\rangle$ + 7.6% $ \pm 7/2\rangle$                             |
| KD6      | <b>34.0%</b> $ \pm 7/2\rangle$ + 15.9% $ \pm 5/2\rangle$ + 15.7% $ \pm 1/2\rangle$ + 13.6% $ \pm 9/2\rangle$ + 13.2% $ \pm 3/2\rangle$ + 6.6% $ \pm 11/2\rangle$ |
| KD7      | <b>31.7%</b> $ \pm 5/2\rangle$ + 24.5% $ \pm 7/2\rangle$ + 20.1% $ \pm 3/2\rangle$ + 12.1% $ \pm 9/2\rangle$ + 6.5% $ \pm 1/2\rangle$ + 4.0% $ \pm 11/2\rangle$  |
| KD8      | <b>34.2%</b> $ \pm 1/2\rangle$ + 27.8% $ \pm 3/2\rangle$ + 18.8% $ \pm 5/2\rangle$ + 11.0% $ \pm 7/2\rangle$ + 5.5% $ \pm 9/2\rangle$                            |
| $\pm mJ$ | <i>wave function decomposition analysis Dy@2</i>                                                                                                                 |
| KD1      | <b>94.9%</b> $ \pm 15/2\rangle$ + 4.6% $ \pm 11/2\rangle$                                                                                                        |
| KD2      | <b>85.7%</b> $ \pm 13/2\rangle$ + 10.5% $ \pm 9/2\rangle$                                                                                                        |
| KD3      | <b>26.7%</b> $ \pm 11/2\rangle$ + 21.0% $ \pm 7/2\rangle$ + 15.8% $ \pm 5/2\rangle$ + 12.9% $ \pm 3/2\rangle$ + 8.7% $ \pm 9/2\rangle$ + 7.7% $ \pm 1/2\rangle$  |
| KD4      | <b>51.7%</b> $ \pm 11/2\rangle$ + 18.2% $ \pm 1/2\rangle$ + 12.3% $ \pm 3/2\rangle$ + 7.7% $ \pm 5/2\rangle$ + 5.5% $ \pm 9/2\rangle$                            |
| KD5      | <b>43.9%</b> $ \pm 9/2\rangle$ + 17.4% $ \pm 1/2\rangle$ + 13.6% $ \pm 3/2\rangle$ + 9.1% $ \pm 5/2\rangle$ + 7.6% $ \pm 7/2\rangle$                             |
| KD6      | <b>33.9%</b> $ \pm 7/2\rangle$ + 15.9% $ \pm 5/2\rangle$ + 15.7% $ \pm 1/2\rangle$ + 13.6% $ \pm 9/2\rangle$ + 13.2% $ \pm 3/2\rangle$ + 6.6% $ \pm 11/2\rangle$ |
| KD7      | <b>31.7%</b> $ \pm 5/2\rangle$ + 24.5% $ \pm 7/2\rangle$ + 20.1% $ \pm 3/2\rangle$ + 12.1% $ \pm 9/2\rangle$ + 6.5% $ \pm 1/2\rangle$ + 4.0% $ \pm 11/2\rangle$  |
| KD8      | <b>34.2%</b> $ \pm 1/2\rangle$ + 27.8% $ \pm 3/2\rangle$ + 18.8% $ \pm 5/2\rangle$ + 11.0% $ \pm 7/2\rangle$ + 5.5% $ \pm 9/2\rangle$                            |

**Table S18.** SINGLE\_ANISO computed wave function decomposition analysis for Dy@1 and Dy@2 centers in dimeric complex **3**. The major dominating values are kept in bold.

| $\pm mJ$ | <i>wave function decomposition analysis Dy@1</i>                                                                                                                  |
|----------|-------------------------------------------------------------------------------------------------------------------------------------------------------------------|
| KD1      | <b>85.2%</b> $ \pm 15/2\rangle$ + 13.5% $ \pm 11/2\rangle$                                                                                                        |
| KD2      | <b>91.6%</b> $ \pm 13/2\rangle$ + 5.1% $ \pm 9/2\rangle$                                                                                                          |
| KD3      | <b>65.3%</b> $ \pm 11/2\rangle$ + 14.3% $ \pm 9/2\rangle$ + 12.0% $ \pm 15/2\rangle$ + 4.2% $ \pm 5/2\rangle$                                                     |
| KD4      | <b>37.4%</b> $ \pm 9/2\rangle$ + 27.4% $ \pm 7/2\rangle$ + 13.2% $ \pm 3/2\rangle$ + 6.3% $ \pm 1/2\rangle$ + 6.1% $ \pm 11/2\rangle$ + 4.3% $ \pm 5/2\rangle$    |
| KD5      | <b>24.2%</b> $ \pm 5/2\rangle$ + 20.2% $ \pm 7/2\rangle$ + 19.3% $ \pm 9/2\rangle$ + 18.1% $ \pm 1/2\rangle$ + 8.0% $ \pm 11/2\rangle$ + 7.7% $ \pm 3/2\rangle$   |
| KD6      | <b>24.3%</b> $ \pm 1/2\rangle$ + 24.1% $ \pm 3/2\rangle$ + 20.6% $ \pm 5/2\rangle$ + 20.3% $ \pm 7/2\rangle$ + 9.3% $ \pm 9/2\rangle$                             |
| KD7      | <b>31.0%</b> $ \pm 3/2\rangle$ + 28.6% $ \pm 1/2\rangle$ + 22.6% $ \pm 5/2\rangle$ + 10.8% $ \pm 7/2\rangle$ + 4.9% $ \pm 9/2\rangle$                             |
| KD8      | <b>23.8%</b> $ \pm 5/2\rangle$ + 22.9% $ \pm 3/2\rangle$ + 21.8% $ \pm 1/2\rangle$ + 19.5% $ \pm 7/2\rangle$ + 9.3% $ \pm 9/2\rangle$                             |
| $\pm mJ$ | <i>wave function decomposition analysis Dy@2</i>                                                                                                                  |
| KD1      | <b>95.5%</b> $ \pm 15/2\rangle$ + 3.5% $ \pm 11/2\rangle$                                                                                                         |
| KD2      | <b>48.9%</b> $ \pm 13/2\rangle$ + 19.4% $ \pm 9/2\rangle$ + 18.4% $ \pm 11/2\rangle$ + 8.4% $ \pm 7/2\rangle$                                                     |
| KD3      | <b>38.6%</b> $ \pm 13/2\rangle$ + 21.0% $ \pm 7/2\rangle$ + 10.8% $ \pm 11/2\rangle$ + 10.9% $ \pm 5/2\rangle$ + 8.8% $ \pm 3/2\rangle$                           |
| KD4      | <b>34.5%</b> $ \pm 11/2\rangle$ + 23.1% $ \pm 1/2\rangle$ + 21.1% $ \pm 5/2\rangle$ + 10.2% $ \pm 3/2\rangle$ + 6.1% $ \pm 9/2\rangle$                            |
| KD5      | <b>30.2%</b> $ \pm 3/2\rangle$ + 24.4% $ \pm 9/2\rangle$ + 13.0% $ \pm 1/2\rangle$ + 11.1% $ \pm 11/2\rangle$ + 9.2% $ \pm 7/2\rangle$ + 8.2% $ \pm 5/2\rangle$   |
| KD6      | <b>30.9%</b> $ \pm 7/2\rangle$ + 20.2% $ \pm 1/2\rangle$ + 18.1% $ \pm 5/2\rangle$ + 18.0% $ \pm 9/2\rangle$ + 6.1% $ \pm 11/2\rangle$ + 5.4% $ \pm 3/2\rangle$   |
| KD7      | <b>30.2%</b> $ \pm 3/2\rangle$ + 28.7% $ \pm 1/2\rangle$ + 20.4% $ \pm 5/2\rangle$ + 8.6% $ \pm 7/2\rangle$ + 5.8% $ \pm 9/2\rangle$ + 4.2% $ \pm 11/2\rangle$    |
| KD8      | <b>20.8%</b> $ \pm 7/2\rangle$ + 19.1% $ \pm 9/2\rangle$ + 18.6% $ \pm 5/2\rangle$ + 14.7% $ \pm 3/2\rangle$ + 11.7% $ \pm 1/2\rangle$ + 11.1% $ \pm 11/2\rangle$ |



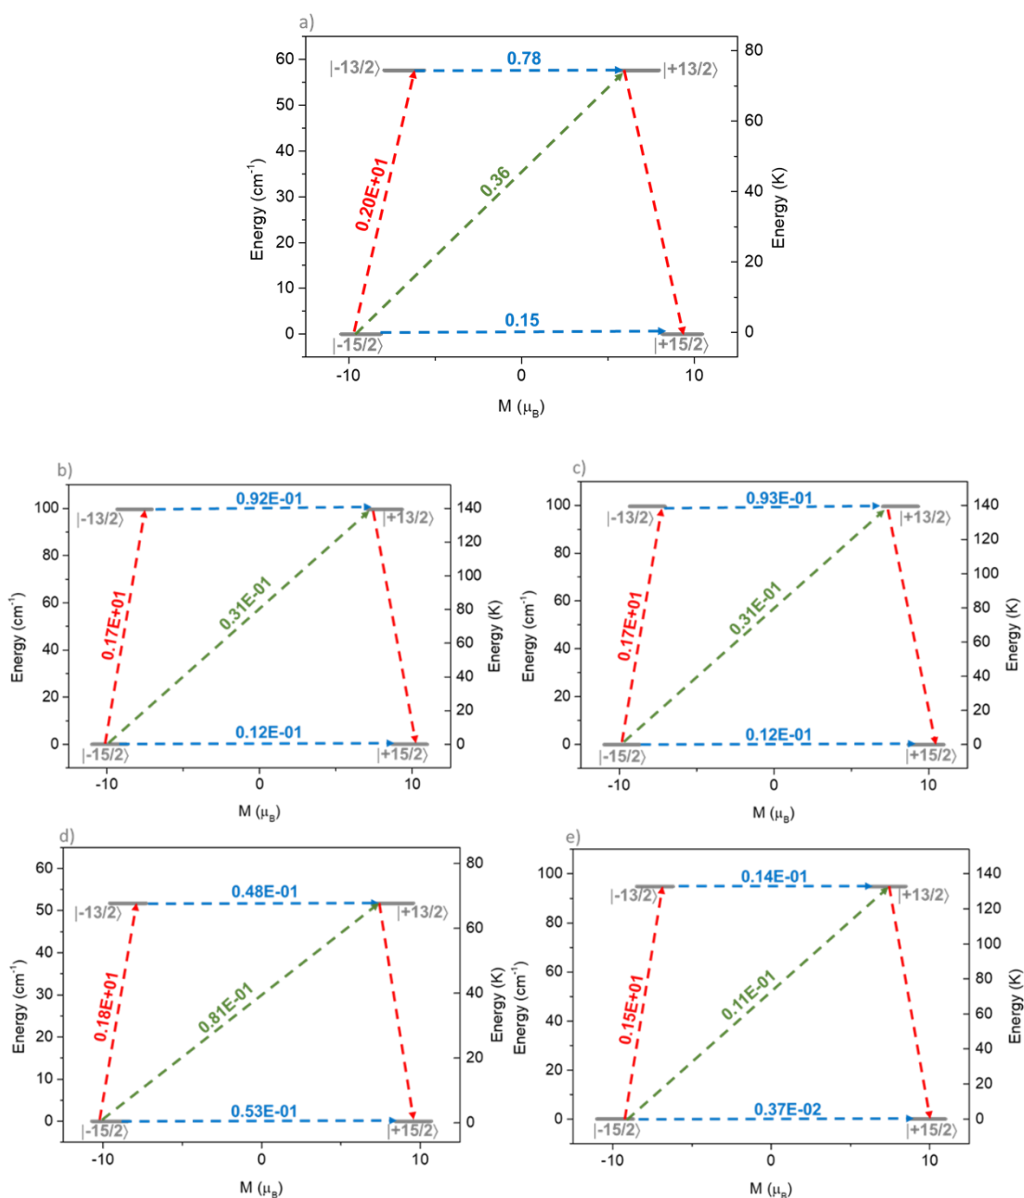

**Figure S10.** Ab initio computed magnetic relaxation pathway for the (a) Dy center in monomer complex **1**; (b) Dy@1 and (c) Dy@2 centers in dimer complex **2**; and (d) Dy@1 and Dy@2 centers in dimer complex **3** respectively. The grey horizontal bars indicate the KDs as magnetic moments' function. The blue, red, and green arrows represent the possible QTM/TA-QTM, Orbach, and Raman relaxation pathways.

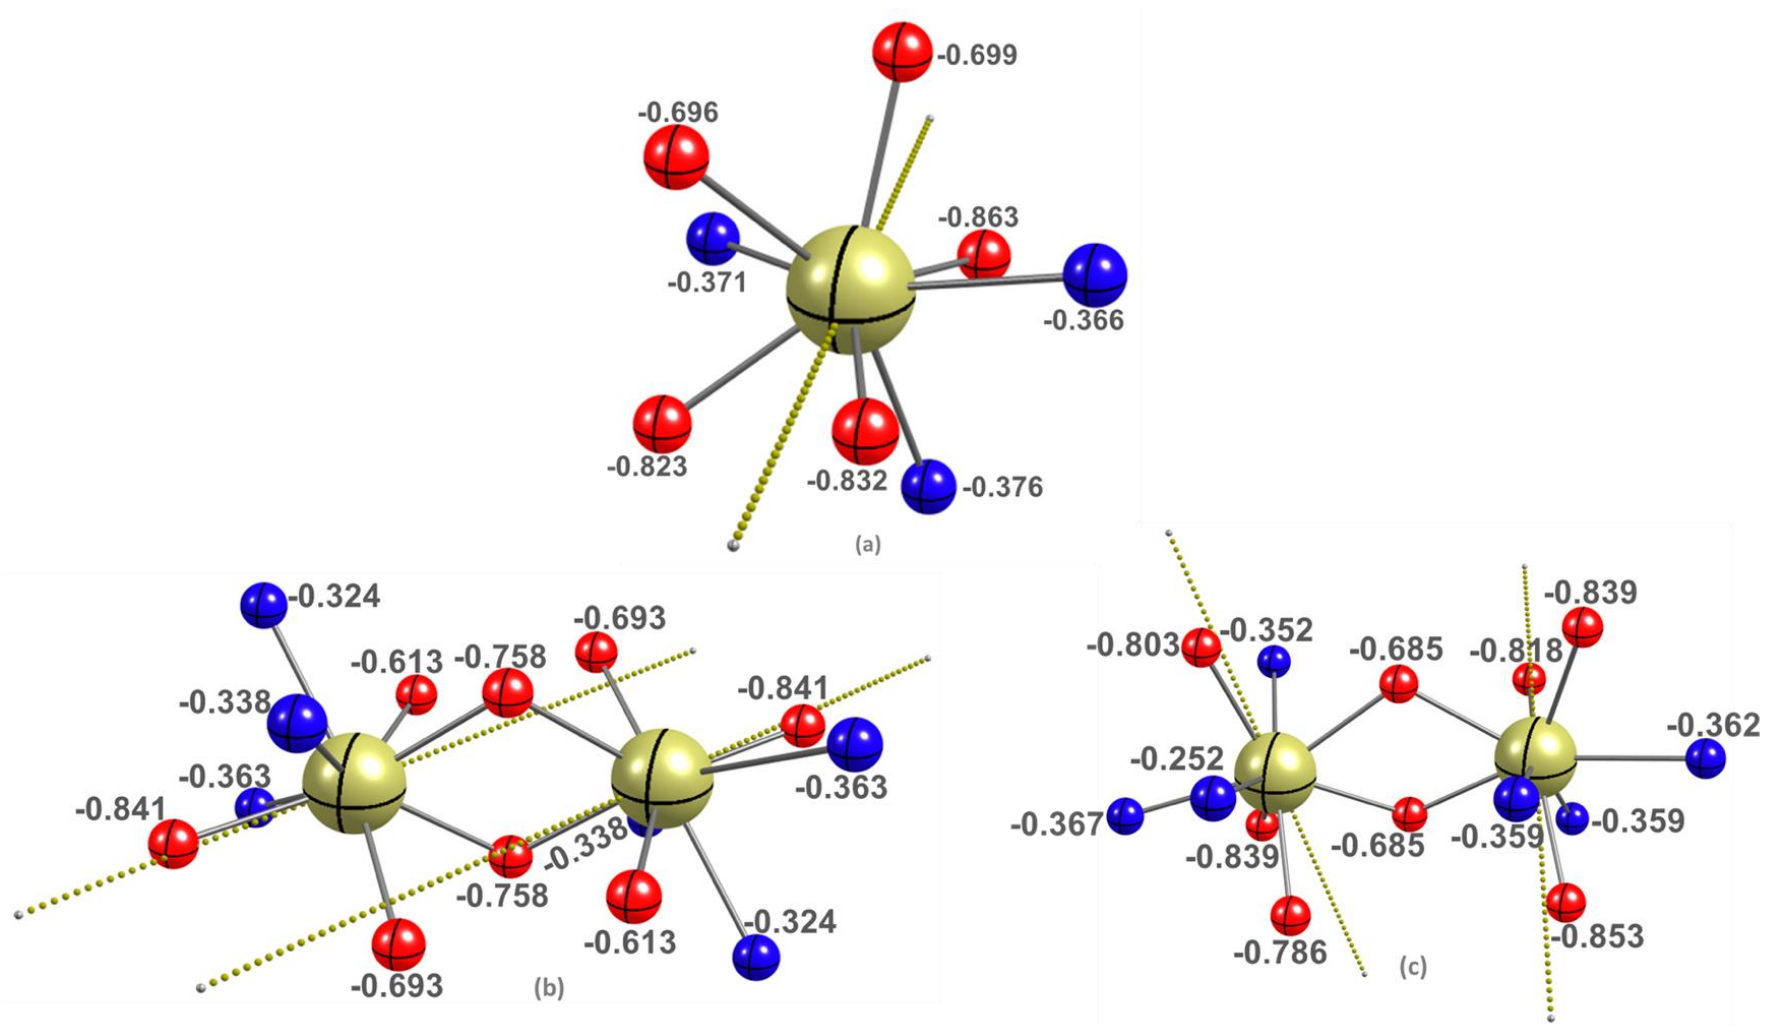

**Figure S11.** CASSCF computed LoProp charges on the first coordinating atoms of Dy centers in (a) monomeric complex **1**; (b) dimeric complex **2**, and (c) dimeric complex **3** respectively.

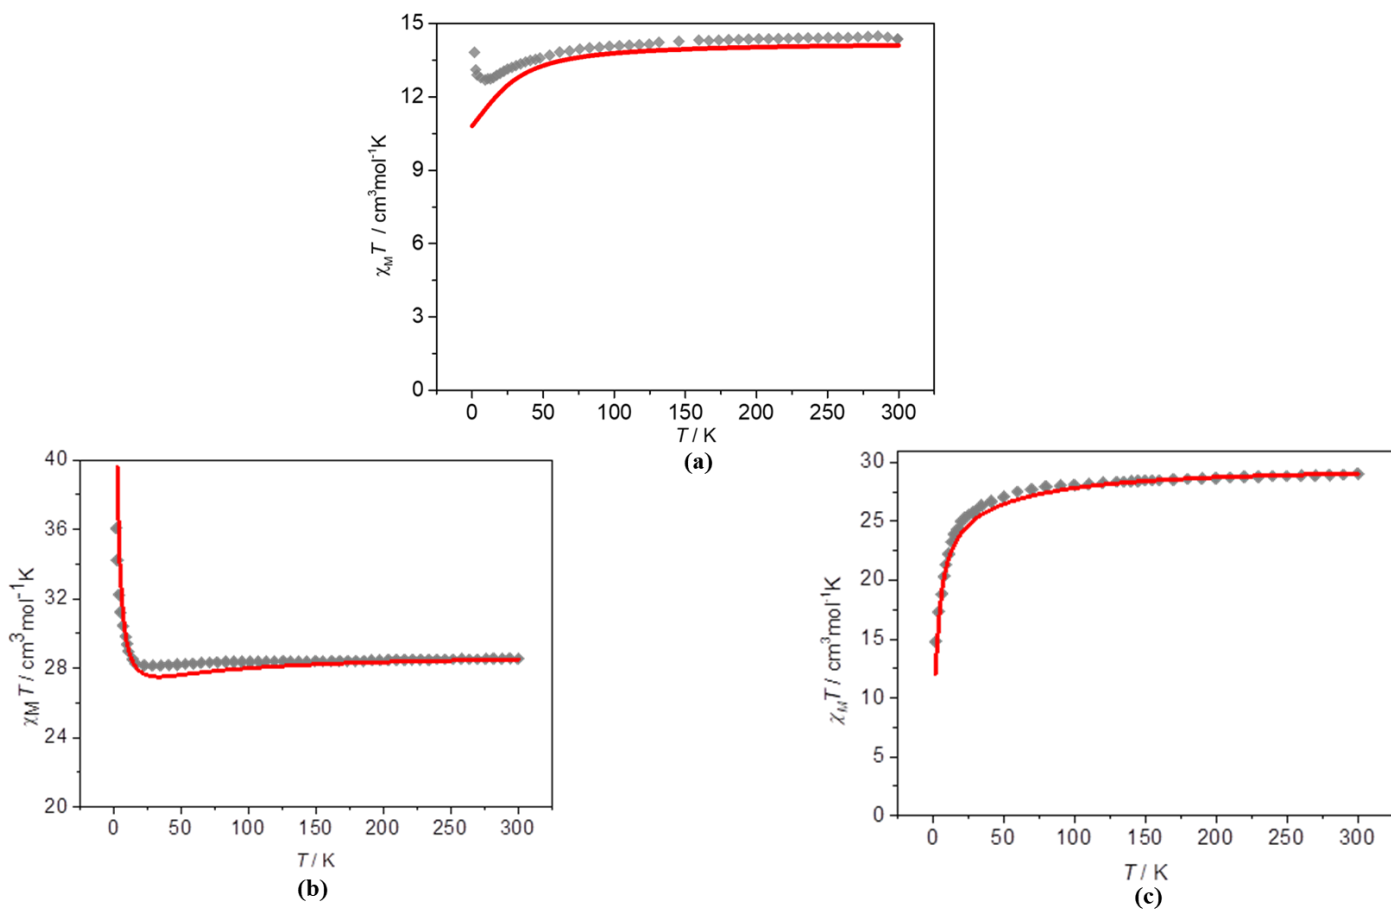

**Figure S12.** Thermal dependence of the molecular magnetic susceptibility for (a) monomer complex **1**; (b) dimer complex **2**; (c) dimer complex **3**. The grey diamond boxes are the experimental values, while the solid red lines represent the POLY\_ANISO simulated data. NOTE: We have increased the simulated data by 4% to meet the experimental values in **2** and **3** respectively.

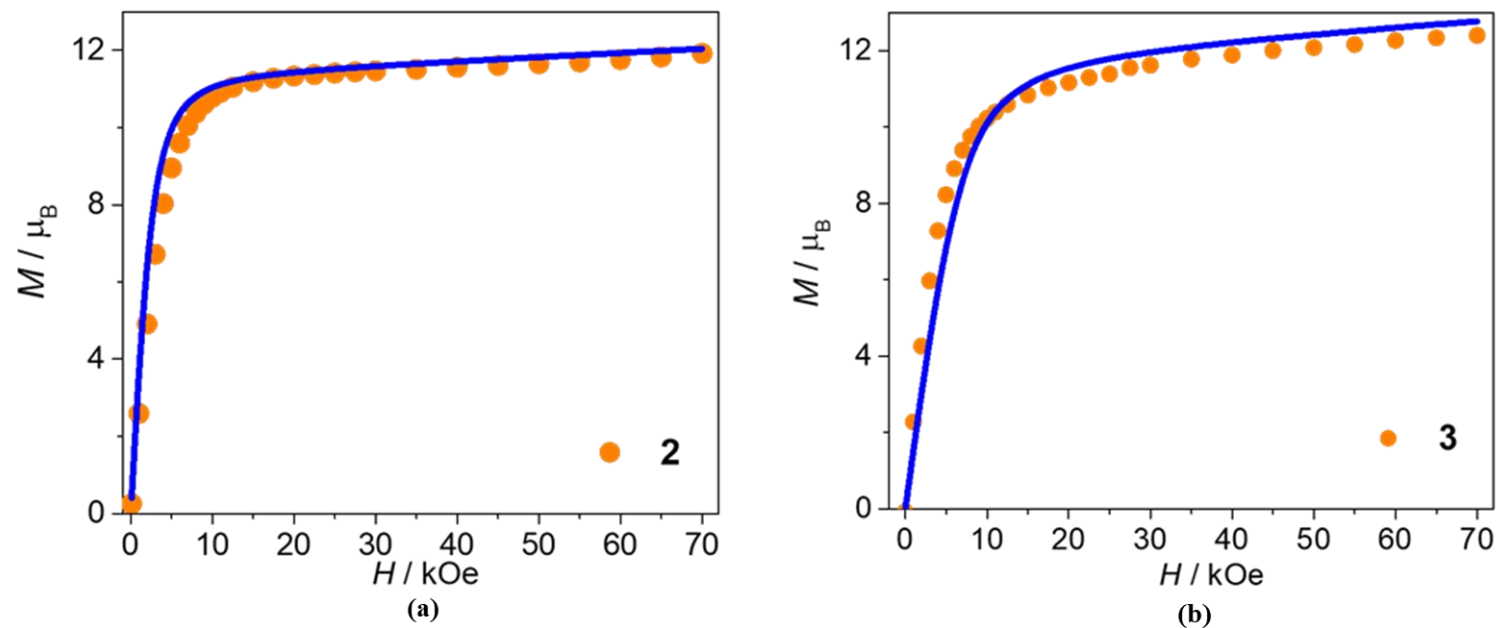

**Figure S13.** Magnetization at 2K for (a) dimer complex **2**; (b) dimer complex **3** respectively. Solid blue lines represent the POLY\_ANISO simulated data. NOTE: We have increased the simulated data by 4% to meet the experimental values.

**Table S19.** Exchange and dipolar interaction obtained from the POLY\_ANISO simulation from the best fit using the Lines model for complexes **2** and **3**.

| Complex        | $J_{total}$ | $J_{ex}$ | $J_{dipo}$ | $zJ$   |
|----------------|-------------|----------|------------|--------|
| <b>2</b> {Dy2} | 0.03        | 0.2      | -0.17      | -0.005 |
| <b>3</b> {Dy2} | -0.22       | -0.3     | 0.08       | -0.002 |

**Table S20.** Energies of the low-lying non-Kramers' exchange doublets along with  $g_{zz}$  and tunneling gap obtained from POLY\_ANISO simulation of complex **2**.

| Exchange doublets | Energy/cm <sup>-1</sup> | $g_{zz}$ | $\Delta_{tunnel}$ |
|-------------------|-------------------------|----------|-------------------|
| 1                 | 0.0                     | 39.3429  | 7.46E-06          |
| 2                 | 2.2                     | 0.0058   | 1.12E-05          |
| 3                 | 99.8                    | 36.1204  | 9.54E-05          |
| 4                 | 99.9                    | 36.1210  | 5.51E-05          |
| 5                 | 101.4                   | 2.8498   | 8.76E-05          |
| 6                 | 101.4                   | 2.8369   | 6.52E-05          |
| 7                 | 199.6                   | 33.0957  | 6.80E-04          |
| 8                 | 200.7                   | 0.01209  | 8.53E-04          |

**Table S21.** Energies of the low-lying non-Kramers' exchange doublets along with  $g_{zz}$  and tunneling gap obtained from POLY\_ANISO simulation of complex **3**.

| Exchange doublets | Energy/cm <sup>-1</sup> | $g_{zz}$ | $\Delta_{\text{tunnel}}$ |
|-------------------|-------------------------|----------|--------------------------|
| 1                 | 0.0                     | 17.8358  | 5.34E-05                 |
| 2                 | 2.2                     | 34.2640  | 5.50E-05                 |
| 3                 | 52.0                    | 18.5109  | 2.19E-05                 |
| 4                 | 53.7                    | 32.0144  | 2.11E-05                 |
| 5                 | 94.4                    | 8.0127   | 1.04E-04                 |
| 6                 | 97.6                    | 36.1903  | 1.04E-04                 |
| 7                 | 146.3                   | 7.9437   | 3.58E-05                 |
| 8                 | 149.1                   | 34.1280  | 2.87E-05                 |

**Table S22.** BS-DFT computed energies of high-spin and broken-symmetry solution of Gdanalogue of complex **1** using  $H = -JS_1S_2$  formalism. All  $J$  values are provided in cm<sup>-1</sup>.

| Complex  | Solution | Energy (E <sub>h</sub> ) | $\rho_{\text{Gd1}}, \rho_{\text{Gd2}}$ | $\langle S^{*2} \rangle$ | $J_{\text{GdGd}}$ | $J_{\text{Dy-Dy}}$<br>[(49/25)<br>* $J_{\text{Gd-Gd}}$ ] |
|----------|----------|--------------------------|----------------------------------------|--------------------------|-------------------|----------------------------------------------------------|
| <b>1</b> | HS       | -31222.110262953120      | 7.0224                                 | 56.0123                  | 0.004             | 0.008                                                    |
|          |          |                          | 7.0224                                 |                          |                   |                                                          |
|          | BS       | -31222.110262656002      | 7.0224                                 | 7.0123                   |                   |                                                          |
|          |          |                          | -7.0223                                |                          |                   |                                                          |

The calculated ferromagnetic intermolecular interaction explains why the single-ion computed  $\chi_{\text{MT}}$  vs T. and experimental  $\chi_{\text{MT}}$  vs T. data deviates at low temperature (see Figure S11a).

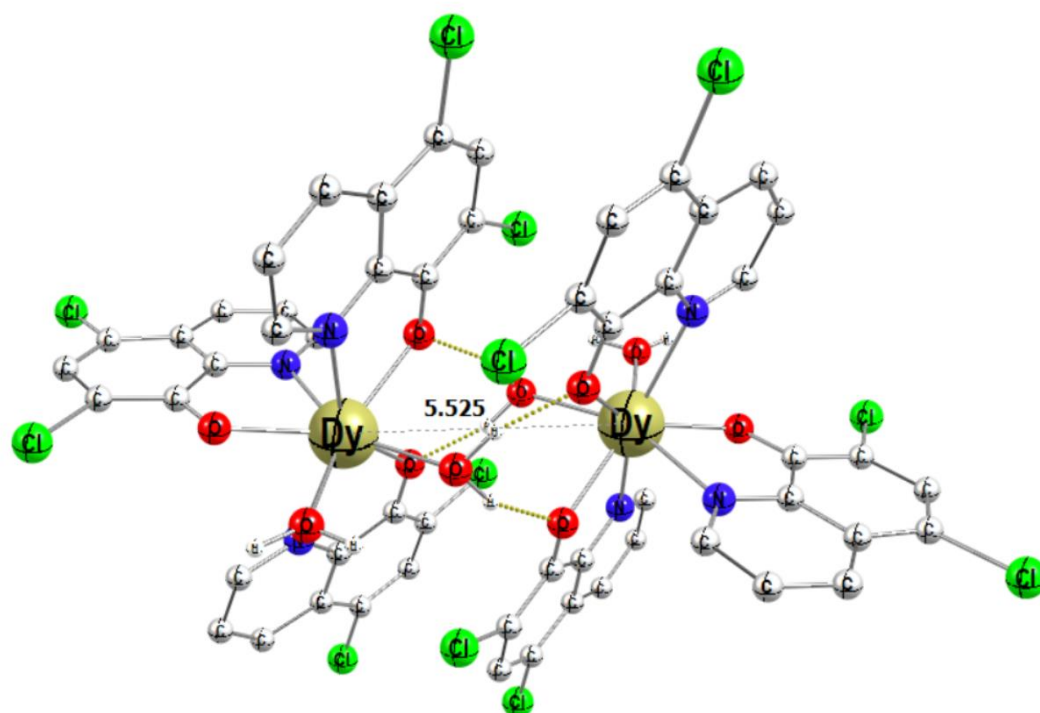

**Figure S14.** Dimeric structure obtained from the crystal structure of complex **1** to compute the intermolecular exchange interaction.

**Table S23.** Basis functions used in ab initio CASSCF calculations using MOLCAS code.

| Atoms | ANO-RCC basis functions |
|-------|-------------------------|
| H     | 2s.                     |
| C     | 3s2p.                   |
| N, O  | 3s2p.                   |
| Cl    | 4s3p.                   |
| Dy    | 7s6p4d2f1g.             |

**Table S24.** Hydrogen optimized cartesian coordinates of complexes **1-3**.

| Complex 1 |                 |                 |                 |
|-----------|-----------------|-----------------|-----------------|
| Dy        | 0.000000000000  | 0.000000000000  | 0.000000000000  |
| Cl        | -4.006300000000 | 1.264600000000  | -3.258600000000 |
| Cl        | 0.294000000000  | -1.296700000000 | 5.141900000000  |
| Cl        | 0.127000000000  | -2.921100000000 | -4.484700000000 |
| Cl        | -6.015100000000 | 4.267000000000  | 0.723000000000  |
| Cl        | -3.865500000000 | -4.578200000000 | 4.241100000000  |
| Cl        | 4.800100000000  | -4.897800000000 | -2.764100000000 |
| O         | -1.736300000000 | 0.761100000000  | -1.335300000000 |
| O         | 0.103000000000  | -0.722900000000 | 2.188700000000  |
| O         | 1.271100000000  | 1.321800000000  | -1.529900000000 |
| O         | 0.150400000000  | -1.393500000000 | -1.893600000000 |
| O         | 1.444500000000  | 1.486300000000  | 1.229300000000  |
| N         | -1.617300000000 | -1.839000000000 | 0.483600000000  |
| N         | -1.648700000000 | 1.548100000000  | 1.200100000000  |
| N         | 2.030000000000  | -1.493200000000 | -0.022300000000 |
| C         | -0.745200000000 | -1.587800000000 | 2.670200000000  |
| C         | -2.699800000000 | 1.550300000000  | -0.908500000000 |
| C         | 1.163700000000  | -2.191000000000 | -2.099800000000 |
| C         | -0.831800000000 | -1.977700000000 | 3.997700000000  |
| C         | -3.799100000000 | 1.935300000000  | -1.657800000000 |
| C         | -2.676900000000 | 2.011500000000  | 0.447700000000  |
| C         | -3.693100000000 | 2.847000000000  | 0.981400000000  |
| C         | -2.653400000000 | -3.168300000000 | 2.240600000000  |
| C         | -1.697500000000 | -2.221300000000 | 1.788000000000  |
| C         | 2.191900000000  | -2.278300000000 | -1.122500000000 |
| C         | 1.334200000000  | -2.972300000000 | -3.224900000000 |
| C         | -3.520700000000 | -3.706200000000 | 1.261700000000  |
| C         | -3.397500000000 | -3.320100000000 | -0.034000000000 |
| C         | -1.595700000000 | 1.893900000000  | 2.477900000000  |
| C         | -3.582800000000 | 3.198100000000  | 2.347700000000  |
| C         | -4.809900000000 | 2.772800000000  | -1.161600000000 |
| C         | -2.438200000000 | -2.390400000000 | -0.388500000000 |
| C         | -1.768300000000 | -2.906100000000 | 4.476800000000  |
| C         | 2.948300000000  | -1.520700000000 | 0.921200000000  |
| C         | 3.327100000000  | -3.118900000000 | -1.271900000000 |
| C         | -4.747300000000 | 3.228700000000  | 0.122500000000  |
| C         | -2.554600000000 | 2.738400000000  | 3.075800000000  |
| C         | -2.660200000000 | -3.476200000000 | 3.624200000000  |
| C         | 2.444500000000  | -3.807100000000 | -3.426800000000 |
| C         | 4.278900000000  | -3.115000000000 | -0.240500000000 |
| C         | 4.092200000000  | -2.331800000000 | 0.846800000000  |
| C         | 3.405900000000  | -3.886800000000 | -2.480300000000 |
| H         | 2.204500000000  | 1.482300000000  | -1.766700000000 |
| H         | 0.819600000000  | 1.136000000000  | -2.384000000000 |
| H         | 1.507400000000  | 2.449700000000  | 1.368900000000  |



|           |                 |                 |                  |
|-----------|-----------------|-----------------|------------------|
| H         | 1.312700000000  | 1.089700000000  | 2.123800000000   |
| H         | -4.279200000000 | -4.438300000000 | 1.577900000000   |
| H         | -4.056300000000 | -3.735700000000 | -0.811100000000  |
| H         | -0.789100000000 | 1.443200000000  | 3.082100000000   |
| H         | -4.360600000000 | 3.843400000000  | 2.784200000000   |
| H         | -5.652700000000 | 3.042800000000  | -1.811900000000  |
| H         | -2.313800000000 | -2.062600000000 | -1.434900000000  |
| H         | -1.779900000000 | -3.154000000000 | 5.546600000000   |
| H         | 2.766000000000  | -0.898300000000 | 1.813300000000   |
| H         | -2.454500000000 | 2.984000000000  | 4.144200000000   |
| H         | 2.517400000000  | -4.389900000000 | -4.354800000000  |
| H         | 5.163300000000  | -3.763300000000 | -0.340300000000  |
| H         | 4.818400000000  | -2.317400000000 | 1.673300000000   |
| Complex 2 |                 |                 |                  |
| Dy        | 0.000000000000  | 0.000000000000  | 0.000000000000   |
| Dy        | 0.205900000000  | -0.873300000000 | -3.774100000000  |
| Cl        | -0.369000000000 | 3.509700000000  | 3.816900000000   |
| Cl        | 3.253700000000  | 0.690400000000  | 6.638800000000   |
| Cl        | 1.552500000000  | -4.997700000000 | -0.015700000000  |
| Cl        | -2.534000000000 | -6.093700000000 | 3.316300000000   |
| Cl        | -3.056000000000 | -1.808900000000 | -3.965000000000  |
| Cl        | -6.295000000000 | 2.380300000000  | -3.114100000000  |
| Cl        | 0.575000000000  | -4.383000000000 | -7.591000000000  |
| Cl        | -3.047800000000 | -1.563700000000 | -10.412900000000 |
| Cl        | -1.346600000000 | 4.124500000000  | -3.758400000000  |
| Cl        | 2.740000000000  | 5.220400000000  | -7.090400000000  |
| Cl        | 3.261900000000  | 0.935600000000  | 0.190900000000   |
| Cl        | 6.500900000000  | -3.253600000000 | -0.660000000000  |
| O         | -0.032300000000 | 1.378900000000  | 1.776400000000   |
| O         | 0.295000000000  | -2.286300000000 | -0.160700000000  |
| O         | -1.287700000000 | -0.476500000000 | -1.917200000000  |
| O         | 0.456300000000  | 2.053800000000  | -1.101500000000  |
| O         | 0.238200000000  | -2.252100000000 | -5.550500000000  |
| O         | -0.089100000000 | 1.413000000000  | -3.613400000000  |
| O         | 1.493700000000  | -0.396800000000 | -1.856900000000  |
| O         | -0.250400000000 | -2.927100000000 | -2.672600000000  |
| N         | 1.493500000000  | -0.801400000000 | 1.992100000000   |
| N         | -1.670600000000 | -1.379300000000 | 1.378000000000   |
| N         | -2.141400000000 | 1.411400000000  | -0.192000000000  |
| N         | -1.287600000000 | -0.071900000000 | -5.766200000000  |
| N         | 1.876500000000  | 0.506000000000  | -5.152000000000  |
| N         | 2.347300000000  | -2.284700000000 | -3.582000000000  |
| C         | 0.687700000000  | 2.120600000000  | 3.921600000000   |
| C         | 1.478000000000  | 1.958600000000  | 5.066400000000   |
| C         | 2.270100000000  | 0.899700000000  | 5.210800000000   |
| C         | 2.401500000000  | -0.092800000000 | 4.169200000000   |
| C         | 1.538400000000  | 0.092200000000  | 3.018200000000   |
| C         | 0.694100000000  | 1.256900000000  | 2.866300000000   |
| C         | 3.159500000000  | -1.214700000000 | 4.191700000000   |

|   |                 |                 |                 |
|---|-----------------|-----------------|-----------------|
| C | 3.179300000000  | -2.119400000000 | 3.121800000000  |
| C | 2.299600000000  | -1.877800000000 | 2.046300000000  |
| C | -0.269300000000 | -3.124200000000 | 0.658100000000  |
| C | 0.111900000000  | -4.452800000000 | 0.821600000000  |
| C | -0.569500000000 | -5.342600000000 | 1.650000000000  |
| C | -1.659300000000 | -4.957800000000 | 2.338100000000  |
| C | -2.080000000000 | -3.577500000000 | 2.305000000000  |
| C | -1.362600000000 | -2.691700000000 | 1.477900000000  |
| C | -3.191800000000 | -3.114700000000 | 3.008900000000  |
| C | -3.469500000000 | -1.724500000000 | 2.904100000000  |
| C | -2.679000000000 | -0.928800000000 | 2.090600000000  |
| C | -2.503400000000 | 0.092000000000  | -2.116900000000 |
| C | -3.343900000000 | -0.339700000000 | -3.081000000000 |
| C | -4.564800000000 | 0.370100000000  | -3.380800000000 |
| C | -4.862500000000 | 1.509400000000  | -2.680800000000 |
| C | -4.076100000000 | 1.913400000000  | -1.575300000000 |
| C | -4.348400000000 | 2.989200000000  | -0.740000000000 |
| C | -3.571600000000 | 3.229000000000  | 0.329000000000  |
| C | -2.476000000000 | 2.458300000000  | 0.601700000000  |
| C | -2.870600000000 | 1.139800000000  | -1.296300000000 |
| C | 0.536700000000  | 3.429400000000  | -0.727900000000 |
| C | -0.481800000000 | -2.993900000000 | -7.695700000000 |
| C | -1.272100000000 | -2.831800000000 | -8.840500000000 |
| C | -2.064100000000 | -1.773000000000 | -8.984900000000 |
| C | -2.195500000000 | -0.780400000000 | -7.943300000000 |
| C | -1.332500000000 | -0.965500000000 | -6.792300000000 |
| C | -0.488200000000 | -2.130200000000 | -6.640400000000 |
| C | -2.953600000000 | 0.341400000000  | -7.965800000000 |
| C | -2.973400000000 | 1.246100000000  | -6.895900000000 |
| C | -2.093700000000 | 1.004500000000  | -5.820400000000 |
| C | 0.475200000000  | 2.250900000000  | -4.432200000000 |
| C | 0.094000000000  | 3.579500000000  | -4.595600000000 |
| C | 0.775400000000  | 4.469400000000  | -5.424100000000 |
| C | 1.865200000000  | 4.084500000000  | -6.112200000000 |
| C | 2.285900000000  | 2.704200000000  | -6.079100000000 |
| C | 1.568500000000  | 1.818500000000  | -5.252000000000 |
| C | 3.397800000000  | 2.241400000000  | -6.783000000000 |
| C | 3.675500000000  | 0.851200000000  | -6.678200000000 |
| C | 2.885000000000  | 0.055500000000  | -5.864700000000 |
| C | 2.709300000000  | -0.965300000000 | -1.657200000000 |
| C | 3.549900000000  | -0.533600000000 | -0.693000000000 |
| C | 4.770700000000  | -1.243400000000 | -0.393300000000 |
| C | 5.068400000000  | -2.382700000000 | -1.093200000000 |
| C | 4.282000000000  | -2.786600000000 | -2.198800000000 |
| C | 4.554300000000  | -3.862400000000 | -3.034100000000 |
| C | 3.777500000000  | -4.102300000000 | -4.103100000000 |
| C | 2.681900000000  | -3.331600000000 | -4.375800000000 |
| C | 3.076500000000  | -2.013100000000 | -2.477800000000 |
| C | -0.330800000000 | -4.302700000000 | -3.046200000000 |
| H | 1.408500000000  | 2.713500000000  | 5.862200000000  |

|                  |                 |                 |                 |
|------------------|-----------------|-----------------|-----------------|
| H                | 3.802600000000  | -1.400100000000 | 5.067800000000  |
| H                | 3.821100000000  | -3.010800000000 | 3.132200000000  |
| H                | 2.248800000000  | -2.564900000000 | 1.187600000000  |
| H                | -0.214300000000 | -6.381500000000 | 1.709500000000  |
| H                | -3.795100000000 | -3.789800000000 | 3.630400000000  |
| H                | -4.313700000000 | -1.280400000000 | 3.451700000000  |
| H                | -2.893100000000 | 0.149800000000  | 2.008600000000  |
| H                | -5.215700000000 | 0.010600000000  | -4.188100000000 |
| H                | -5.236400000000 | 3.604900000000  | -0.951700000000 |
| H                | -3.803100000000 | 4.071900000000  | 1.000300000000  |
| H                | -1.822500000000 | 2.607600000000  | 1.476400000000  |
| H                | -0.434700000000 | 3.853100000000  | -0.371100000000 |
| H                | 0.890300000000  | 4.045300000000  | -1.594100000000 |
| H                | 1.302300000000  | 3.571200000000  | 0.076100000000  |
| H                | -1.202600000000 | -3.586800000000 | -9.636300000000 |
| H                | -3.596700000000 | 0.526800000000  | -8.841900000000 |
| H                | -3.615100000000 | 2.137500000000  | -6.906300000000 |
| H                | -2.042900000000 | 1.691600000000  | -4.961700000000 |
| H                | 0.420200000000  | 5.508200000000  | -5.483600000000 |
| H                | 4.001100000000  | 2.916500000000  | -7.404500000000 |
| H                | 4.519600000000  | 0.407100000000  | -7.225800000000 |
| H                | 3.099000000000  | -1.023100000000 | -5.782700000000 |
| H                | 5.421600000000  | -0.883900000000 | 0.414000000000  |
| H                | 5.442300000000  | -4.478200000000 | -2.822400000000 |
| H                | 4.009000000000  | -4.945200000000 | -4.774300000000 |
| H                | 2.028400000000  | -3.480900000000 | -5.250500000000 |
| H                | 0.640700000000  | -4.726400000000 | -3.402900000000 |
| H                | -0.684400000000 | -4.918600000000 | -2.180000000000 |
| H                | -1.096300000000 | -4.444500000000 | -3.850200000000 |
| <b>Complex 3</b> |                 |                 |                 |
| Dy               | 0.000000000000  | 0.000100000000  | 0.000100000000  |
| Dy               | -4.040800000000 | 0.776600000000  | 0.031900000000  |
| Cl               | 0.426000000000  | -3.383500000000 | -3.916000000000 |
| Cl               | 5.745800000000  | -3.243700000000 | -3.052700000000 |
| Cl               | -0.251400000000 | -5.676100000000 | 4.742900000000  |
| Cl               | 1.703300000000  | -0.673700000000 | 4.940400000000  |
| Cl               | 2.177900000000  | 7.107300000000  | 0.256800000000  |
| Cl               | 0.109400000000  | 3.906700000000  | -3.528900000000 |
| Cl               | -5.893300000000 | -4.743700000000 | -4.463900000000 |
| Cl               | -4.772100000000 | -4.354000000000 | 0.778900000000  |
| Cl               | -9.302000000000 | 4.019400000000  | 3.982200000000  |
| Cl               | -4.950700000000 | 1.076700000000  | 5.181600000000  |
| Cl               | -1.458000000000 | 7.659800000000  | -0.384200000000 |
| Cl               | -3.894000000000 | 4.301200000000  | -3.835700000000 |
| O                | 0.812900000000  | -0.562100000000 | 2.069800000000  |
| O                | 0.365500000000  | -1.218200000000 | -1.866000000000 |
| O                | 0.096400000000  | 1.836800000000  | -1.337600000000 |
| O                | -3.973600000000 | 2.440500000000  | -1.505900000000 |
| O                | -4.672900000000 | 0.831600000000  | 2.218400000000  |

|   |                 |                 |                 |
|---|-----------------|-----------------|-----------------|
| O | -4.666800000000 | -1.385900000000 | 0.214400000000  |
| O | -2.059000000000 | 0.054300000000  | 1.301500000000  |
| O | -2.118600000000 | 0.000100000000  | -1.253400000000 |
| N | -0.276700000000 | -2.540300000000 | 0.685300000000  |
| N | 2.442400000000  | -0.202600000000 | -0.503500000000 |
| N | 0.844100000000  | 2.150700000000  | 1.180700000000  |
| N | -3.010200000000 | 2.912400000000  | 0.938500000000  |
| N | -6.222000000000 | 1.987000000000  | 0.382600000000  |
| N | -5.120000000000 | -0.188400000000 | -2.099500000000 |
| N | -2.191800000000 | -0.520800000000 | 2.501800000000  |
| N | -2.118500000000 | 0.000100000000  | -2.599500000000 |
| C | 0.679000000000  | -1.682900000000 | 2.637700000000  |
| C | 1.024700000000  | -1.970300000000 | 3.995500000000  |
| C | 0.780800000000  | -3.177800000000 | 4.618800000000  |
| C | 0.157000000000  | -4.210900000000 | 3.895900000000  |
| C | -0.182600000000 | -4.053300000000 | 2.590600000000  |
| C | 0.065600000000  | -2.771000000000 | 1.982400000000  |
| C | -0.836100000000 | -3.494700000000 | -0.053600000000 |
| C | -1.122300000000 | -4.775100000000 | 0.422400000000  |
| C | -0.799800000000 | -5.054700000000 | 1.769500000000  |
| C | 3.459900000000  | 0.330500000000  | 0.138400000000  |
| C | 4.800900000000  | 0.019200000000  | -0.130100000000 |
| C | 5.055800000000  | -0.981900000000 | -1.065600000000 |
| C | 4.020300000000  | -1.597700000000 | -1.762000000000 |
| C | 2.690500000000  | -1.163200000000 | -1.477200000000 |
| C | 1.542400000000  | -1.688700000000 | -2.149000000000 |
| C | 1.758400000000  | -2.689400000000 | -3.084300000000 |
| C | 3.082400000000  | -3.171500000000 | -3.329700000000 |
| C | 4.142900000000  | -2.658200000000 | -2.732400000000 |
| C | 0.527800000000  | 2.961200000000  | -1.030900000000 |
| C | 0.619400000000  | 4.071000000000  | -1.910300000000 |
| C | 1.143300000000  | 5.315500000000  | -1.522100000000 |
| C | 1.527700000000  | 5.542100000000  | -0.188400000000 |
| C | 1.464000000000  | 4.495900000000  | 0.756500000000  |
| C | 0.949000000000  | 3.256700000000  | 0.288400000000  |
| C | 1.808800000000  | 4.645700000000  | 2.062500000000  |
| C | 1.668400000000  | 3.533200000000  | 3.021700000000  |
| C | 1.234900000000  | 2.334000000000  | 2.446500000000  |
| C | -1.665200000000 | 0.053900000000  | 3.609100000000  |
| C | -1.806500000000 | -0.534500000000 | 4.821600000000  |
| C | -2.475500000000 | -1.760600000000 | 4.968900000000  |
| C | -2.846500000000 | -1.684100000000 | 2.586300000000  |
| C | -3.004500000000 | -2.317900000000 | 3.801100000000  |
| C | -2.227000000000 | -1.160500000000 | -3.224700000000 |
| C | -2.295900000000 | -1.233600000000 | -4.601400000000 |
| C | -2.267100000000 | -0.053000000000 | -5.342100000000 |
| C | -2.112700000000 | 1.131900000000  | -4.674700000000 |
| C | -2.046800000000 | 1.162700000000  | -3.285600000000 |
| C | -5.356400000000 | 0.430300000000  | -3.250000000000 |
| C | -5.739400000000 | -0.265400000000 | -4.447800000000 |

|   |                 |                 |                 |
|---|-----------------|-----------------|-----------------|
| C | -5.810200000000 | -1.637100000000 | -4.408600000000 |
| C | -5.536700000000 | -2.334600000000 | -3.219700000000 |
| C | -5.226700000000 | -1.564600000000 | -2.070400000000 |
| C | -4.958700000000 | -2.167100000000 | -0.779800000000 |
| C | -5.034500000000 | -3.545900000000 | -0.748500000000 |
| C | -5.334900000000 | -4.322400000000 | -1.866500000000 |
| C | -5.556800000000 | -3.737100000000 | -3.062300000000 |
| C | -6.971700000000 | 2.549100000000  | -0.558900000000 |
| C | -8.142200000000 | 3.270900000000  | -0.276500000000 |
| C | -8.488600000000 | 3.461200000000  | 1.049000000000  |
| C | -7.707500000000 | 2.920400000000  | 2.067100000000  |
| C | -7.942600000000 | 3.086000000000  | 3.459500000000  |
| C | -7.113300000000 | 2.525900000000  | 4.390600000000  |
| C | -5.972800000000 | 1.778300000000  | 3.980800000000  |
| C | -5.688600000000 | 1.547900000000  | 2.642000000000  |
| C | -6.566900000000 | 2.150100000000  | 1.685700000000  |
| C | -2.597100000000 | 3.138100000000  | 2.167700000000  |
| C | -1.931800000000 | 4.325800000000  | 2.546800000000  |
| C | -1.772900000000 | 5.338000000000  | 1.607100000000  |
| C | -2.879600000000 | 3.906100000000  | 0.000900000000  |
| C | -2.251400000000 | 5.140100000000  | 0.306600000000  |
| C | -2.173900000000 | 6.108500000000  | -0.742400000000 |
| C | -2.672800000000 | 5.844800000000  | -1.953100000000 |
| C | -3.270100000000 | 4.594800000000  | -2.233800000000 |
| C | -3.421500000000 | 3.605400000000  | -1.285300000000 |
| H | 1.043500000000  | -3.324200000000 | 5.674400000000  |
| H | -1.025700000000 | -3.226500000000 | -1.107000000000 |
| H | -1.582600000000 | -5.535400000000 | -0.222700000000 |
| H | -1.005500000000 | -6.041000000000 | 2.209900000000  |
| H | 3.208800000000  | 1.071000000000  | 0.916400000000  |
| H | 5.613400000000  | 0.515200000000  | 0.417500000000  |
| H | 6.089900000000  | -1.294100000000 | -1.279000000000 |
| H | 3.202900000000  | -3.986200000000 | -4.059700000000 |
| H | 1.211400000000  | 6.130000000000  | -2.255400000000 |
| H | 2.185800000000  | 5.619800000000  | 2.409200000000  |
| H | 1.954400000000  | 3.623600000000  | 4.076500000000  |
| H | 1.183300000000  | 1.416800000000  | 3.061600000000  |
| H | -1.122200000000 | 0.988700000000  | 3.437500000000  |
| H | -1.354300000000 | -0.035400000000 | 5.690100000000  |
| H | -3.305800000000 | -2.041600000000 | 1.651000000000  |
| H | -3.555500000000 | -3.268200000000 | 3.814100000000  |
| H | -2.262100000000 | -2.038900000000 | -2.571500000000 |
| H | -2.393700000000 | -2.219300000000 | -5.074600000000 |
| H | -2.061100000000 | 2.096600000000  | -5.197800000000 |
| H | -1.892900000000 | 2.065800000000  | -2.694600000000 |
| H | -5.211000000000 | 1.525100000000  | -3.245400000000 |
| H | -5.947800000000 | 0.302500000000  | -5.365600000000 |
| H | -6.080600000000 | -2.216900000000 | -5.304700000000 |
| H | -5.378200000000 | -5.415700000000 | -1.764800000000 |
| H | -6.625600000000 | 2.421600000000  | -1.596900000000 |

|   |                 |                 |                 |
|---|-----------------|-----------------|-----------------|
| H | -8.742000000000 | 3.695900000000  | -1.093400000000 |
| H | -9.383400000000 | 4.042100000000  | 1.321000000000  |
| H | -7.307500000000 | 2.661600000000  | 5.463400000000  |
| H | -2.809300000000 | 2.344800000000  | 2.902900000000  |
| H | -1.583100000000 | 4.452600000000  | 3.581500000000  |
| H | -1.278400000000 | 6.286500000000  | 1.861300000000  |
| H | -2.617400000000 | 6.591400000000  | -2.758000000000 |
| H | -2.581900000000 | -2.247100000000 | 5.947600000000  |
| H | -2.336600000000 | -0.080000000000 | -6.440200000000 |

## References

- S1) SAINT Software Users Guide, version 7.0; Bruker Analytical X-Ray Systems: Madison, WI, 1999.
- S2) G. M. Sheldrick, SADABS, version 2.03; Bruker Analytical X-Ray Systems, Madison, WI, 2000.
- S3) G. M. Sheldrick, SHELXTL, Version 6.14, Bruker AXS, Inc.; Madison, WI 2000-2003.
- S4) Dolomanov, O. V.; Bourhis, L. J.; Gildea, R. J.; Howard, J. A. K.; Puschmann, H. OLEX2: A Complete Structure Solution, Refinement and Analysis Program. *J. Appl. Crystallogr.* **2009**, *42*, 339–341.
- S5) Neese, F. Software Update: The ORCA Program System—Version 5.0. *WIREs Computational Molecular Science* n/a (n/a), e1606.
- S6) Becke, A. D. Density-Functional Exchange-Energy Approximation with Correct Asymptotic Behavior. *Phys. Rev. A* **1988**, *38*, 3098–3100.
- S7) Perdew, J. P. Density-Functional Approximation for the Correlation Energy of the Inhomogeneous Electron Gas. *Phys. Rev. B* **1986**, *33*, 8822–8824.
- S8) Weigend, F.; Ahlrichs, R. Balanced Basis Sets of Split Valence, Triple Zeta Valence and Quadruple Zeta Valence Quality for H to Rn: Design and Assessment of Accuracy. *Phys. Chem. Chem. Phys.* **2005**, *7*, 3297–3305.
- S9) Weigend, F. Accurate Coulomb-Fitting Basis Sets for H to Rn. *Phys. Chem. Chem. Phys.* **2006**, *8*, 1057–1065.
- S10) Aquilante, F.; Autschbach, J.; Carlson, R. K.; Chibotaru, L. F.; Delcey, M. G.; De Vico, L.; Fdez. Galván, I.; Ferré, N.; Frutos, L. M.; Gagliardi, L.; Garavelli, M.; Giussani, A.; Hoyer, C. E.; Li Manni, G.; Lischka, H.; Ma, D.; Malmqvist, P. Å.; Müller, T.; Nenov, A.; Olivucci, M.; Pedersen, T. B.; Peng, D.; Plasser, F.; Pritchard, B.; Reiher, M.; Rivalta, I.; Schapiro, I.; Segarra-Martí, J.; Stenrup, M.; Truhlar, D. G.; Ungur, L.; Valentini, A.; Vancoillie, S.; Veryazov, V.; Vysotskiy, V. P.; Weingart, O.; Zapata, F.; Lindh, R. Molcas 8: New Capabilities for Multiconfigurational Quantum Chemical Calculations across the Periodic Table. *Journal of Computational Chemistry* **2016**, *37*, 506–541.
- S11) Roos, B. O.; Taylor, P. R.; Sigbahn, P. E. M. A Complete Active Space SCF Method (CASSCF) Using a Density Matrix Formulated Super-CI Approach. *Chemical Physics* **1980**, *48*, 157–173.
- S12) Roos, B. O.; Veryazov, V.; Widmark, P.-O. Relativistic Atomic Natural Orbital Type Basis Sets for the Alkaline and Alkaline-Earth Atoms Applied to the Ground-State Potentials for the

- Corresponding Dimers. *Theor Chem Acc* **2004**, *111*, 345–351.
- S13) Roos, B. O.; Lindh, R.; Malmqvist, P.-Å.; Veryazov, V.; Widmark, P.-O.; Borin, A. C. New Relativistic Atomic Natural Orbital Basis Sets for Lanthanide Atoms with Applications to the Ce Diatom and LuF<sub>3</sub>. *J. Phys. Chem. A* **2008**, *112*, 11431–11435.
- S14) Aquilante, F.; Lindh, R.; Bondo Pedersen, T. Unbiased Auxiliary Basis Sets for Accurate Two-Electron Integral Approximations. *J. Chem. Phys.* **2007**, *127*, 114107.
- S15) Malmqvist, P. Å.; Roos, B. O.; Schimmelpfennig, B. The Restricted Active Space (RAS) State Interaction Approach with Spin–Orbit Coupling. *Chemical Physics Letters* **2002**, *357*, 230–240.
- S16) Chibotaru, L. F.; Ungur, L. Ab Initio Calculation of Anisotropic Magnetic Properties of Complexes. I. Unique Definition of Pseudospin Hamiltonians and Their Derivation. *J. Chem. Phys.* **2012**, *137*, 064112.
- S17) Tian, H.; Ungur, L.; Zhao, L.; Ding, S.; Tang, J.; Chibotaru, L. F. Exchange Interactions Switch Tunneling: A Comparative Experimental and Theoretical Study on Relaxation Dynamics by Targeted Metal Ion Replacement. *Chem. Eur. J.* **2018**, *24*, 9928–9939.
- S18) Chibotaru, L. F.; Ungur, L.; Aronica, C.; Elmoll, H.; Pilet, G.; Luneau, D. Structure, Magnetism, and Theoretical Study of a Mixed-Valence CoII<sub>3</sub>CoIII<sub>4</sub> Heptanuclear Wheel: Lack of SMM Behavior despite Negative Magnetic Anisotropy. *J. Am. Chem. Soc.* **2008**, *130*, 12445–12455.
- S19) Chibotaru, L. F.; Ungur, L.; Soncini, A. The Origin of Nonmagnetic Kramers Doublets in the Ground State of Dysprosium Triangles: Evidence for a Toroidal Magnetic Moment. *Angew. Chem. Int. Ed. Edition* **2008**, *47*, 4126–4129.
